# Supplementary material for: 5-Selenization of salicylic acid derivatives yielded isoform-specific 5-lipoxygenase inhibitors
Source: Royal Society of Chemistry journal article supplement (doi:10.1039/b918778b), 2009-12-23
Supplement: b918778b.pdf [file b918778b.pdf]

# 5-Selenization of Salicylic Acid Derivatives Yielded Isoform-specific 5-Lipoxygenase Inhibitors

(Supplementary Information)

*Sun-Chol Yu, Hartmut Kuhn, Constantin G. Daniliuc, Igor Ivanov, Peter G. Jones, and  
Wolf-Walther du Mont*

*Institute of Biochemistry, University Medicine Berlin-Charité, Monbijoustrasse 2, 10117 Berlin, Germany*

*Department of Pharmacy, Pyongyang University of Medicine, Kangan-dong, Songyo district, Pyongyang, DPR of Korea*

*Institute of Inorganic and Analytical Chemistry, Technical University of Braunschweig, Hagenring 30, 38106 Braunschweig,  
Germany*

## Contents

|                                            |     |
|--------------------------------------------|-----|
| 1. Spectra of salicyloyl caproic acid..... | S2  |
| 2. Spectra of <b>2b</b> .....              | S4  |
| 3. Spectra of <b>3c</b> .....              | S8  |
| 4. Spectra of <b>3d</b> .....              | S11 |
| 5. Spectra of <b>3e</b> .....              | S15 |
| 6. Spectra of <b>4e</b> .....              | S19 |
| 7. Spectra of <b>5e</b> .....              | S23 |

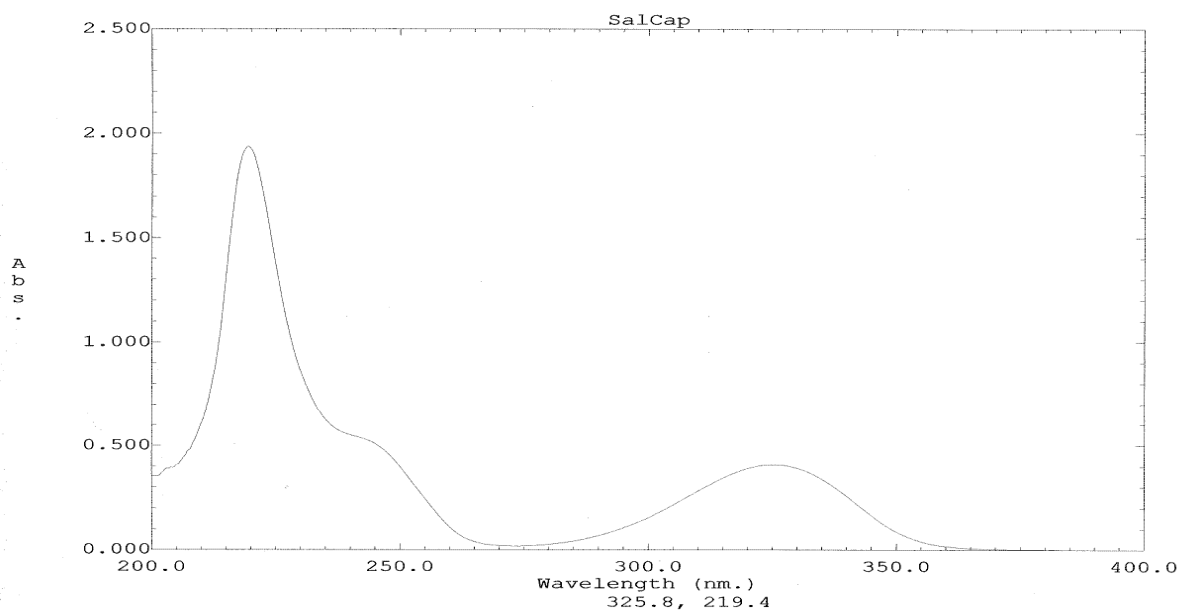

File Name: CAP

Created: 19:09 29.04.09  
Data: Original

Measuring Mode: Abs.  
Scan Speed: Medium  
Slit Width: 2.0  
Sampling Interval: 0.2

Figure SI-1. UV spectrum of salicyloyl caproic acid.

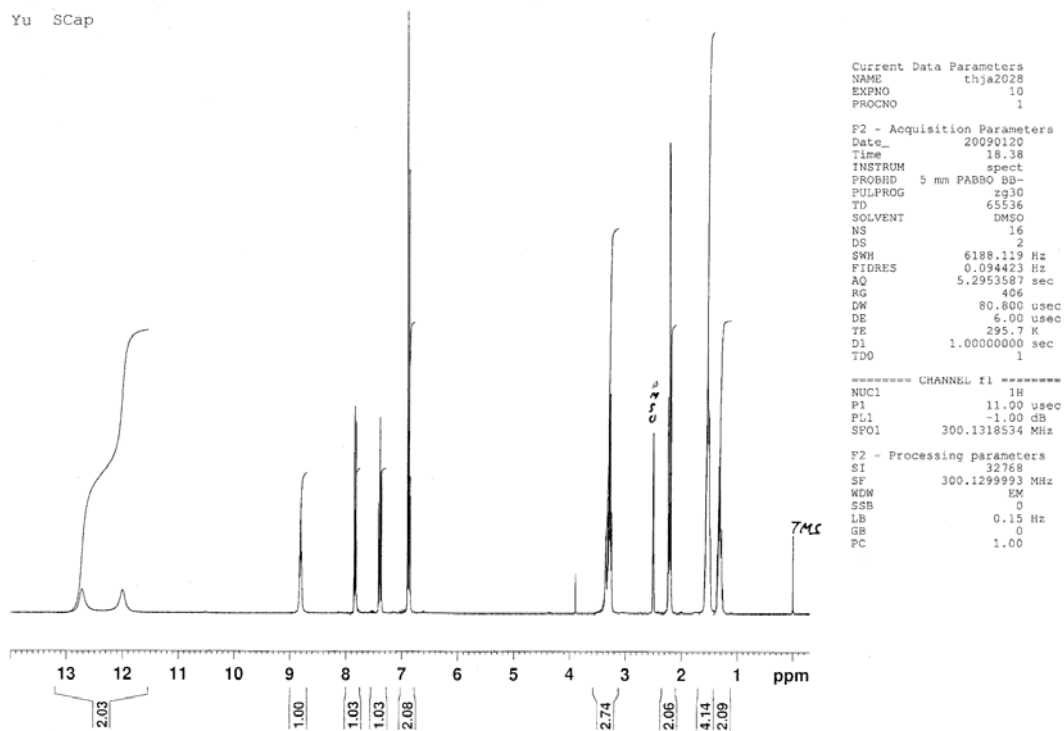

Figure SI-2. <sup>1</sup>H-NMR spectrum of salicyloyl caproic acid

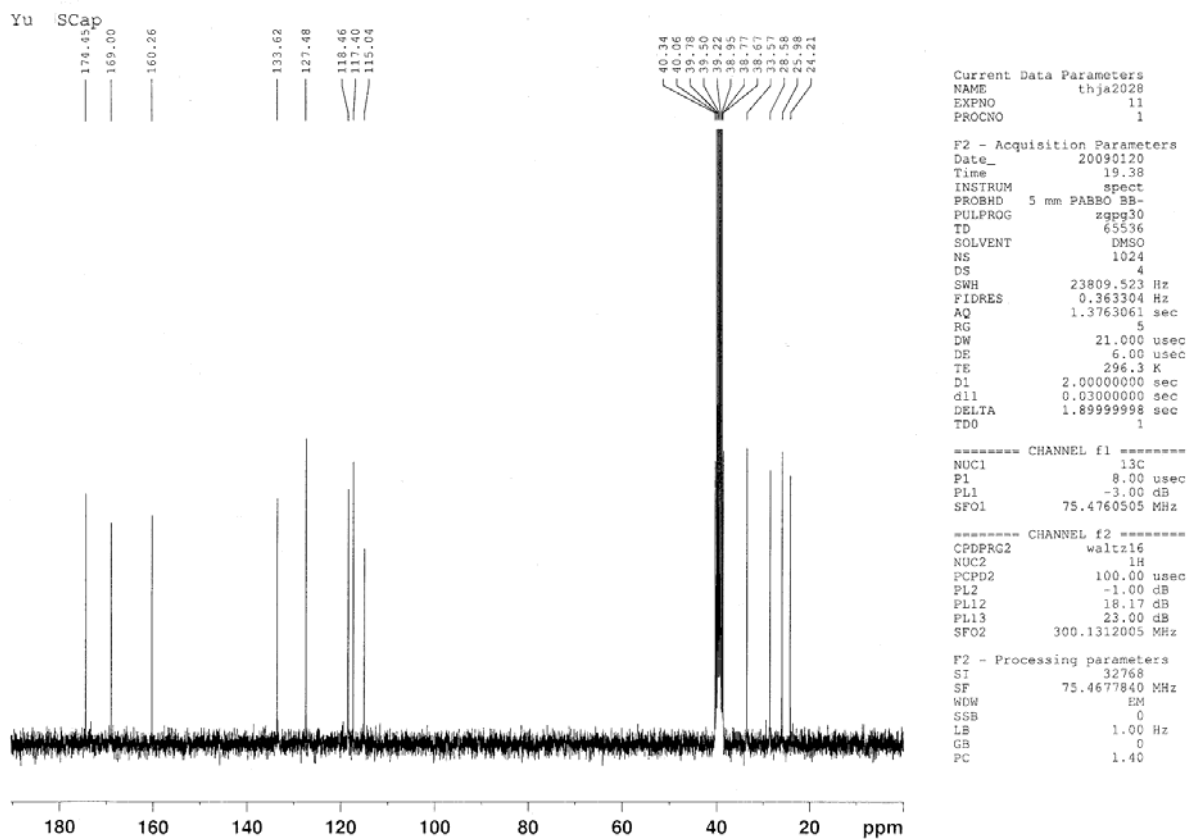

Figure SI-3.  $^{13}\text{C}$ -NMR spectrum of salicyloyl caproic acid

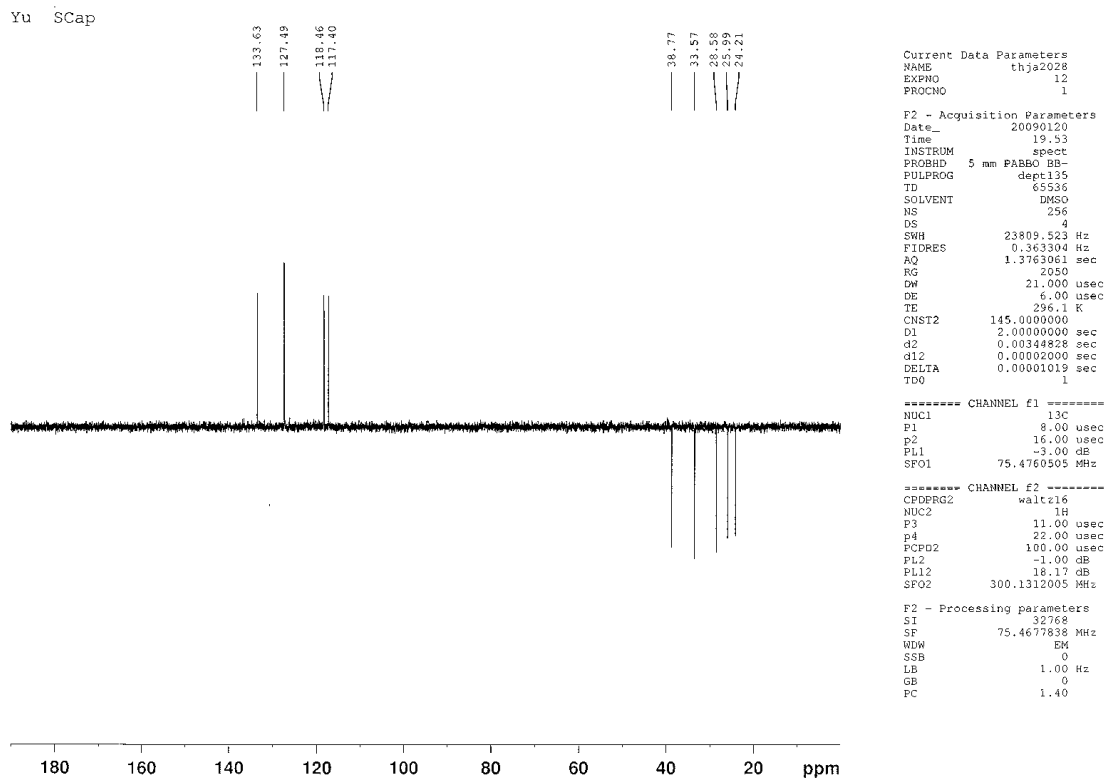

Figure SI-4. 2D-NMR spectrum (HMQC) of salicyloyl caproic acid

:\ms-daten-lin\...Yu\_SCap\_pos\_07012009

07.01.2009 09:35:14

Yu SCap

u\_SCap\_pos\_07012009#17-187 RT: 0.22-4.93 AV: 85 NL: 3.97E6  
: FTMS + c NSI Full ms [100.00-600.00]

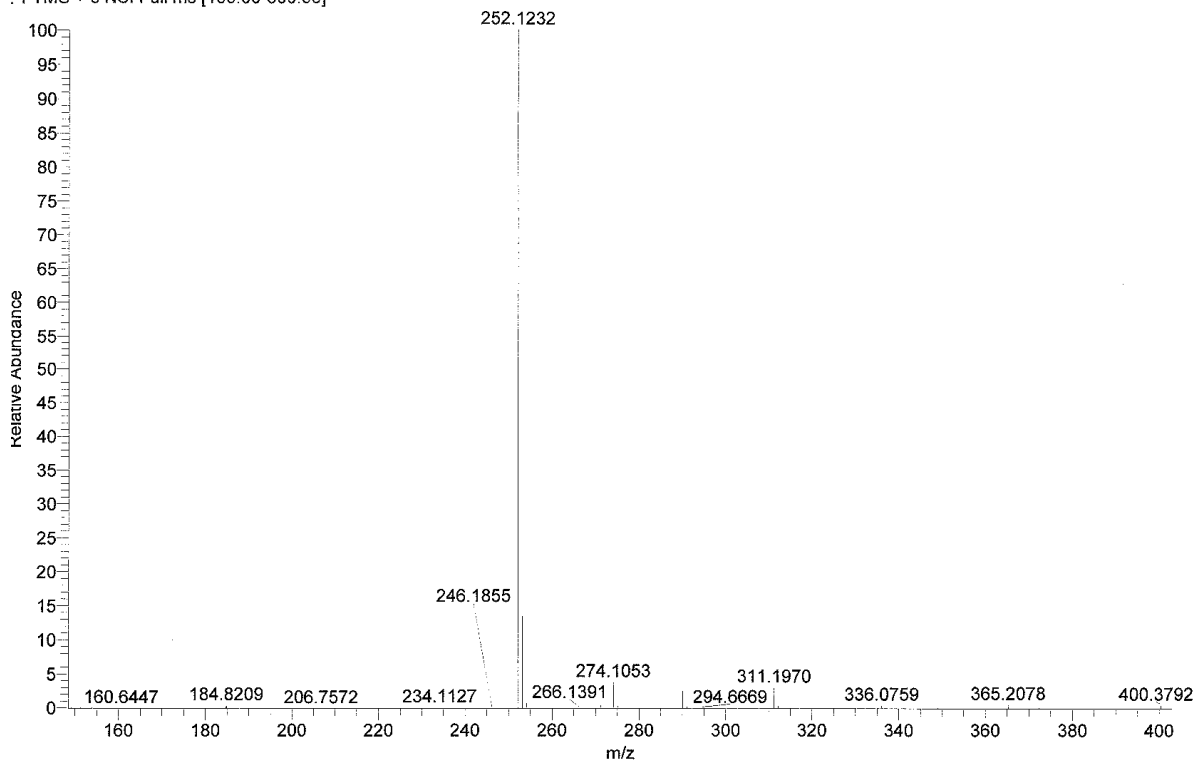

Figure SI-5. HR-MS spectrum of salicyloyl caproic acid

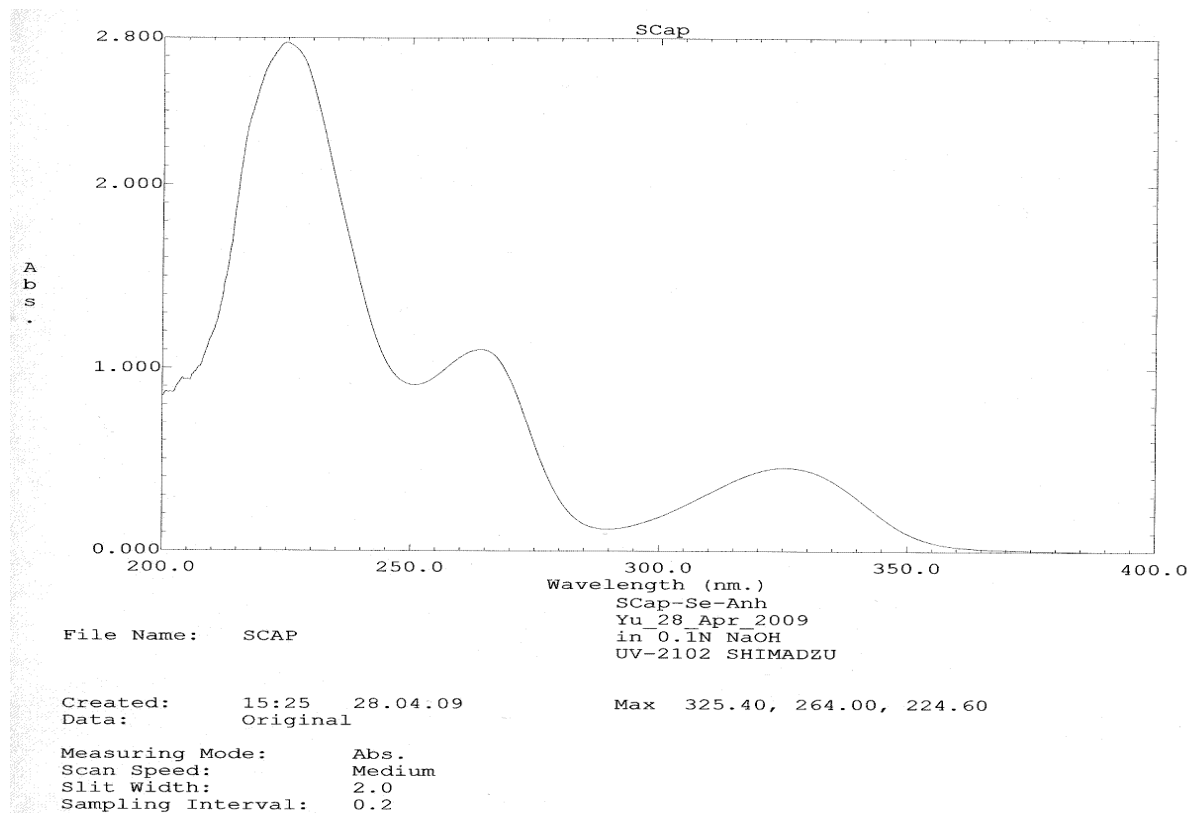

Figure SI-6. UV spectrum of **2b**

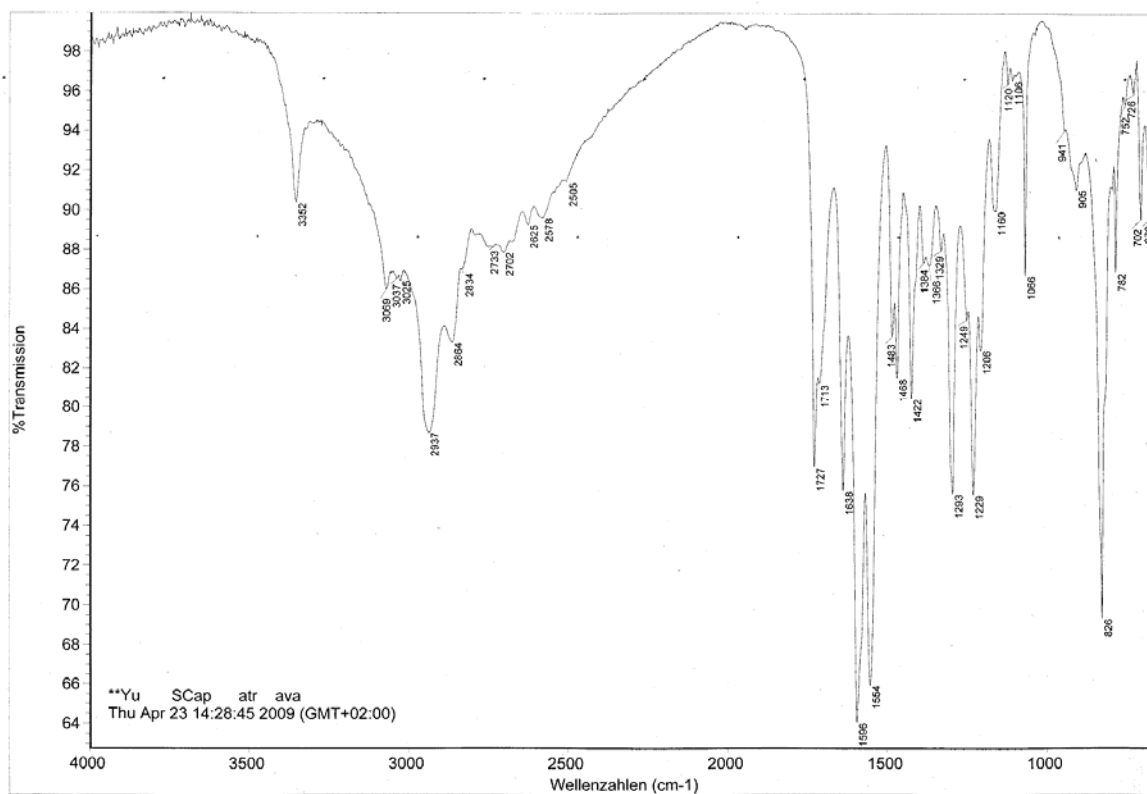

Figure SI-7. FT-IR spectrum of **2b**

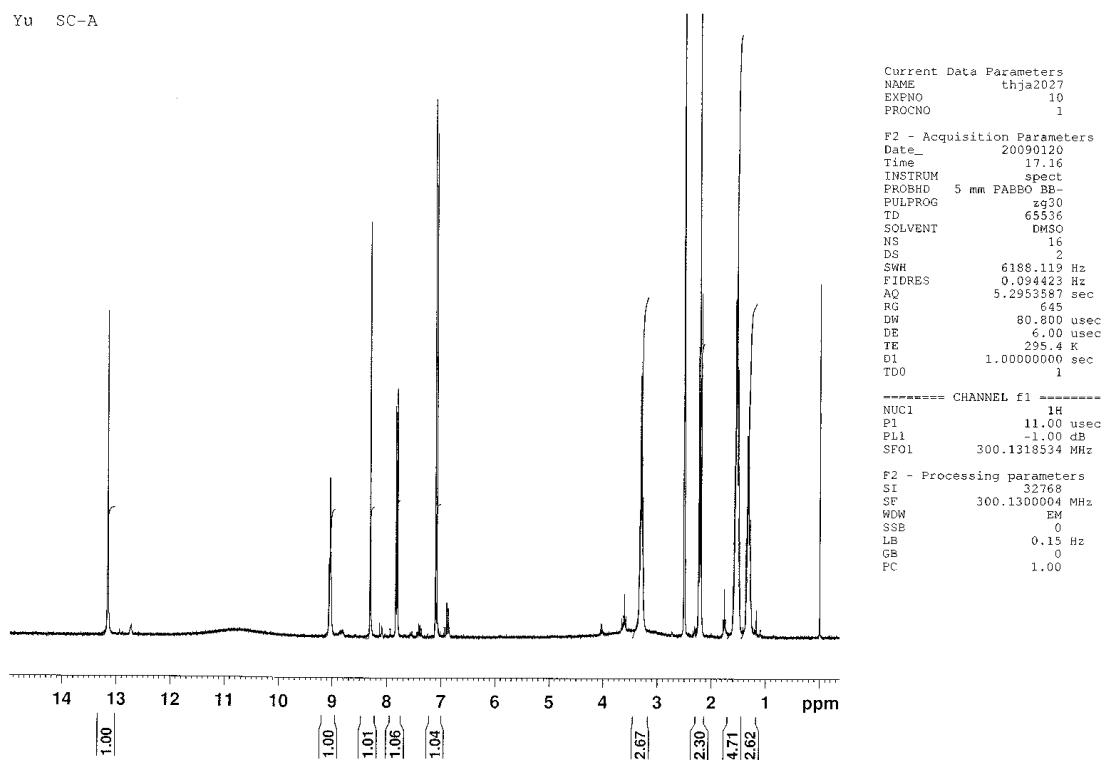

Figure SI-8.  $^1\text{H-NMR}$  spectrum of **2b**

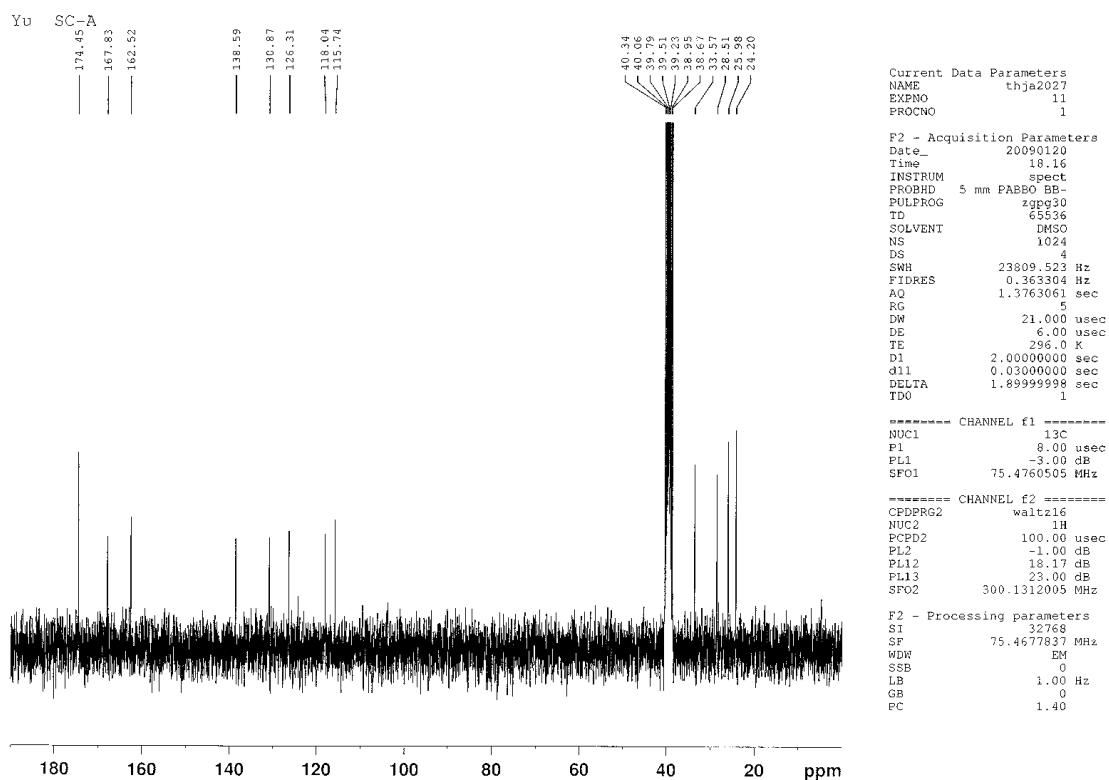

Figure SI-9.  $^{13}\text{C}$ -NMR spectrum of **2b**

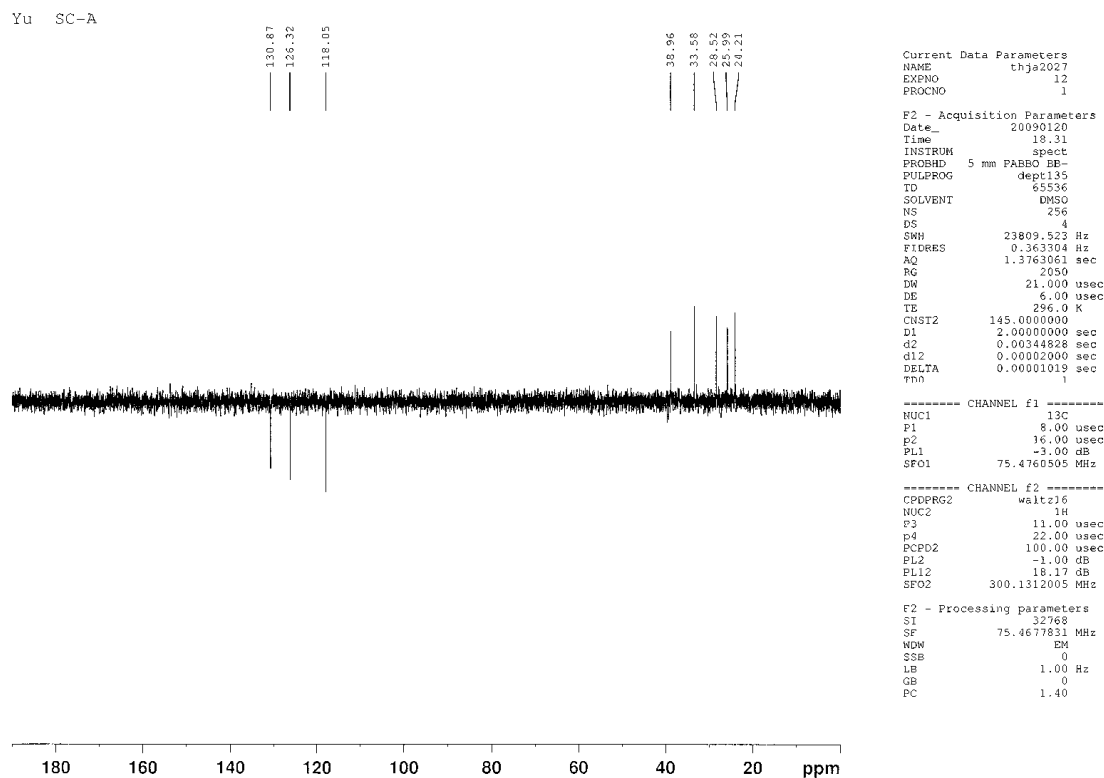

Figure SI-10. 2D-NMR spectrum (HMQC) of **2b**

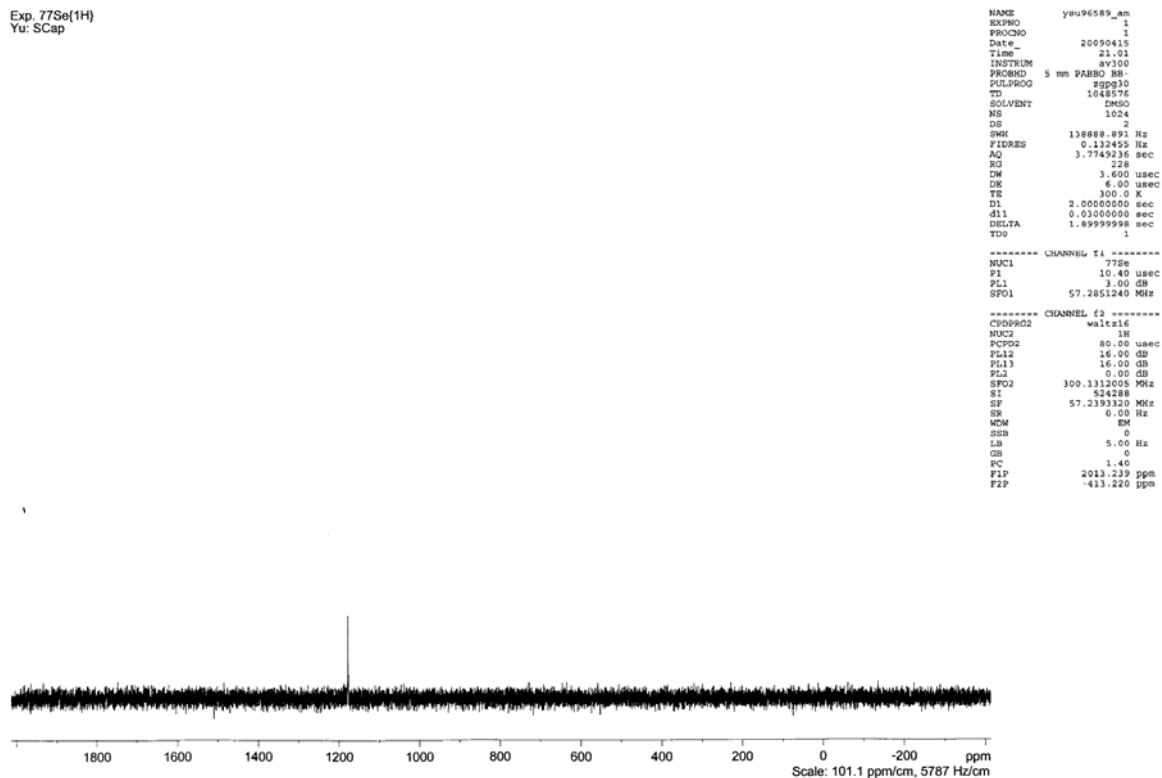

Figure SI-11.  $^{77}\text{Se}$ -NMR spectrum of **2b**

:\ms-daten-lin\...\Yu\_SC-A\_pos\_07012009

07.01.2009 09:41:13

Yu SC - A

u\_SC-A\_pos\_07012009 #103-187 RT: 2.57-4.94 AV: 42 NL: 5.89E5  
FTMS + c NSI Full ms [150.00-1300.00]

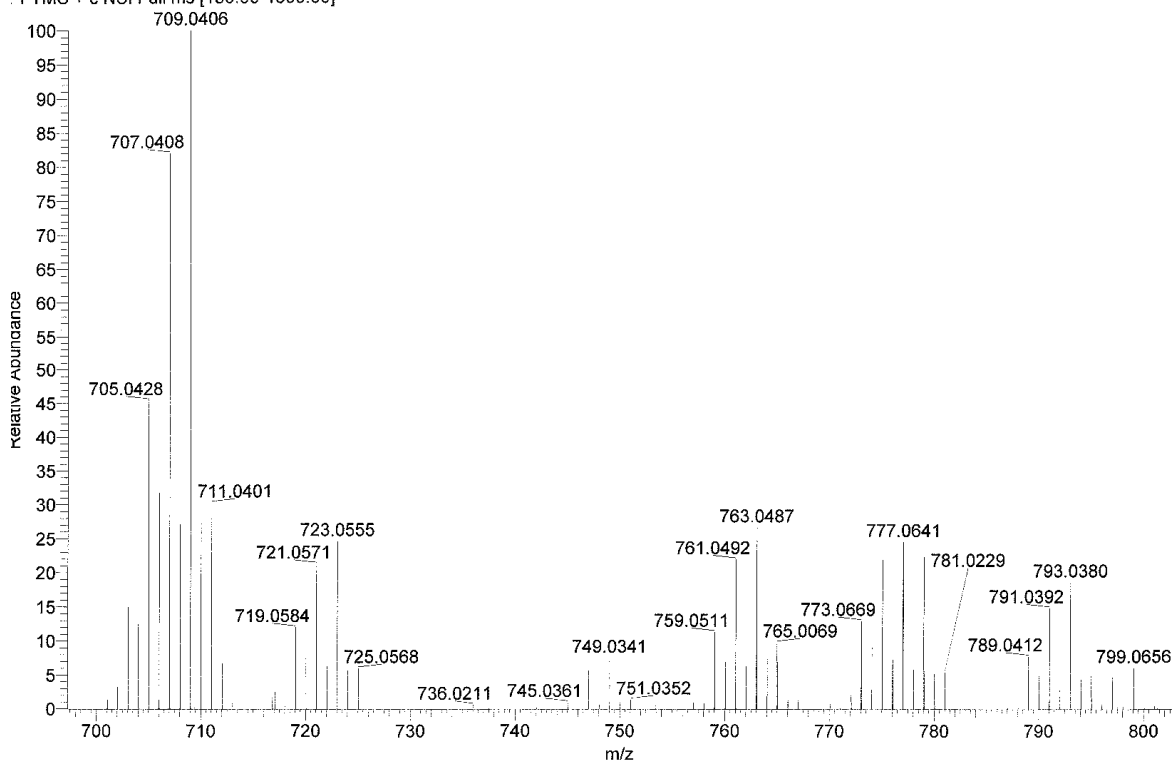

Figure SI-12. HR-MS spectrum of **2b**

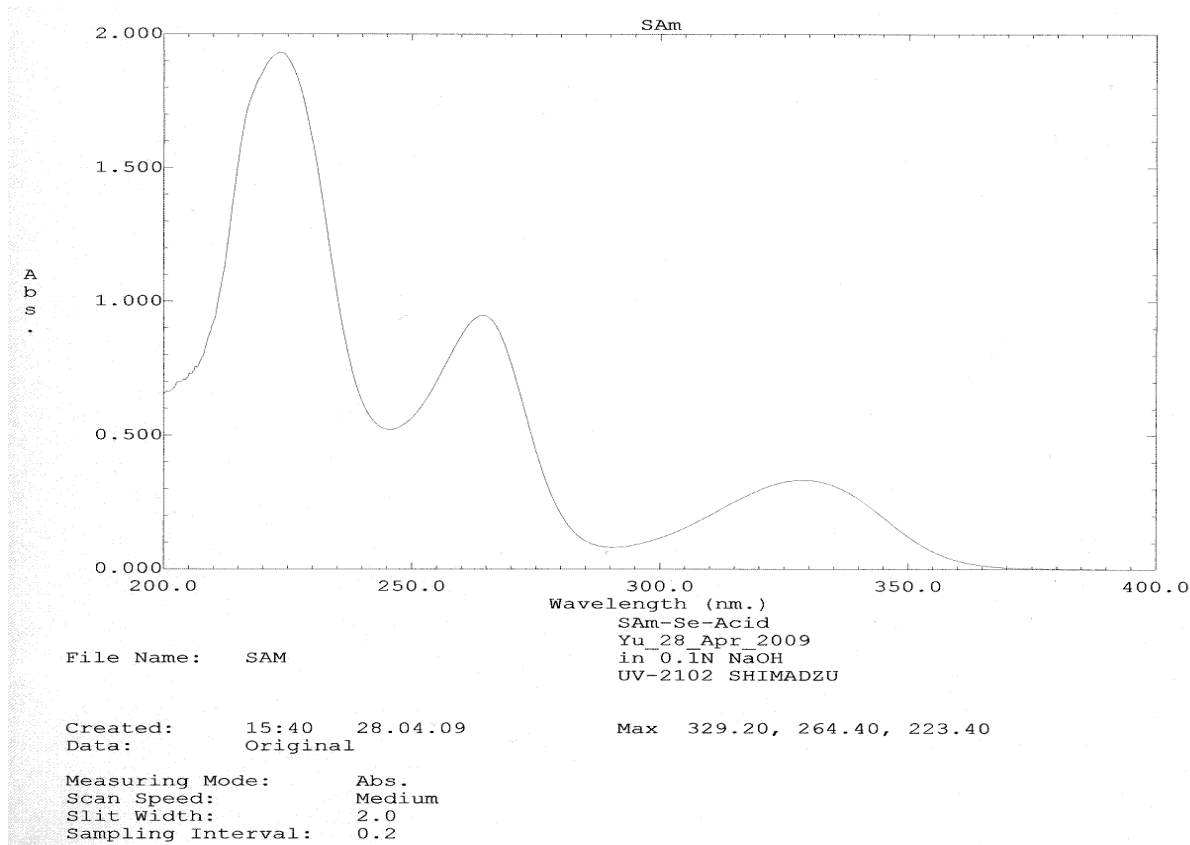

Figure SI-13. UV spectrum of **3c**

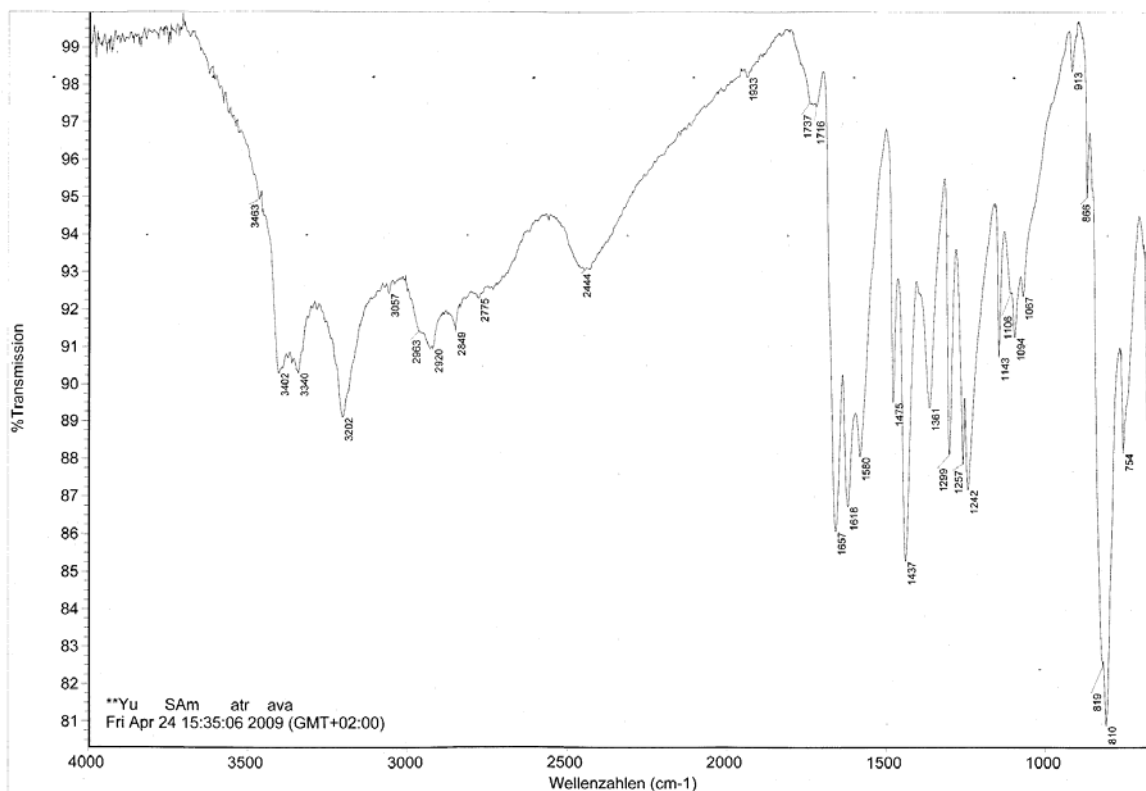

Figure SI-14. FT-IR spectrum of **3c**



Yu SAM-A

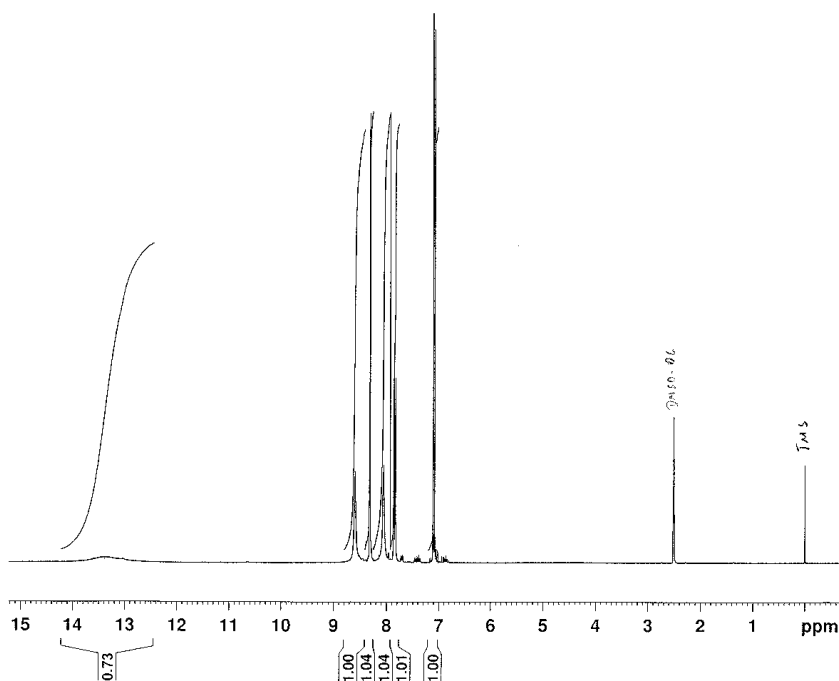

```
Current Data Parameters
NAME      thja2025
EXPNO    10
PROCNO   1

F2 - Acquisition Parameters
Date_    20090120
Time     15.00
INSTRUM spect
PROBHD   5 mm PABBO BB-
PULPROG zg30
TD       65536
SOLVENT  DMSO
NS       16
DS       2
SWH      6188.119 Hz
FIDRES   0.094423 Hz
AQ       5.2953587 sec
RG       512
DW       80.800 usec
DE       6.00 usec
TE       295.5 K
D1       1.0000000 sec
TD0      1

===== CHANNEL f1 =====
NUC1     1H
P1       11.00 usec
PL1     -1.00 dB
SFO1    300.1318534 MHz

F2 - Processing parameters
SI       32768
SF       300.1299990 MHz
WDW      EM
SSB      0
LB       0.15 Hz
GB       0
PC       1.00
```

Figure SI-15.  $^1\text{H}$ -NMR spectrum of **3c**

Yu SAM-A

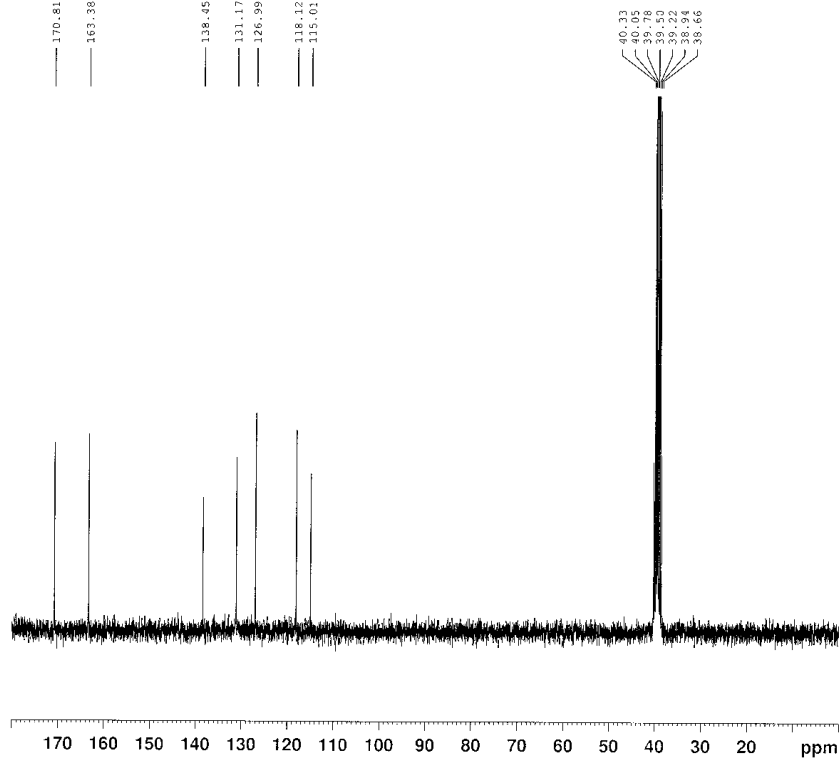

```
Current Data Parameters
NAME      thja2025
EXPNO    11
PROCNO   1

F2 - Acquisition Parameters
Date_    20090120
Time     15.05
INSTRUM spect
PROBHD   5 mm PABBO BB-
PULPROG zgpg30
TD       65536
SOLVENT  DMSO
NS       512
DS       4
SWH      23809.523 Hz
FIDRES   0.363304 Hz
AQ       1.3763061 sec
RG       5
DW       21.000 usec
DE       6.00 usec
TE       295.9 K
D1       2.0000000 sec
d11      0.0300000 sec
DELTA    1.89999998 sec
TD0      1

===== CHANNEL f1 =====
NUC1     13C
P1       8.00 usec
PL1     -3.00 dB
SFO1    75.4760505 MHz

===== CHANNEL f2 =====
CPDPRG2 waltz16
NUC2     1H
PCPD2    100.00 usec
PL2     -1.00 dB
PL12    18.17 dB
PL13    23.00 dB
SFO2    300.1312005 MHz

F2 - Processing parameters
SI       32768
SF       75.4677821 MHz
WDW      EM
SSB      0
LB       1.00 Hz
GB       0
PC       1.40
```

Figure SI-16.  $^{13}\text{C}$ -NMR spectrum of **3c**

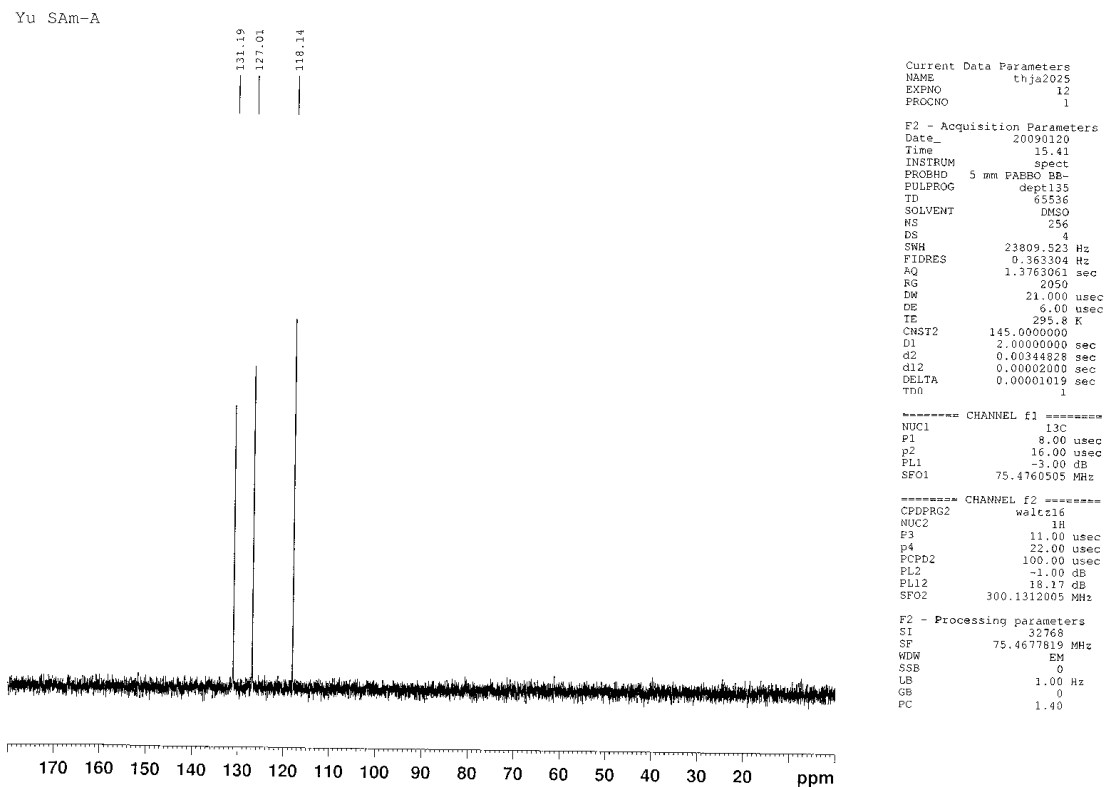

Figure SI-17. 2D-NMR spectrum (HMQC) of **3c**

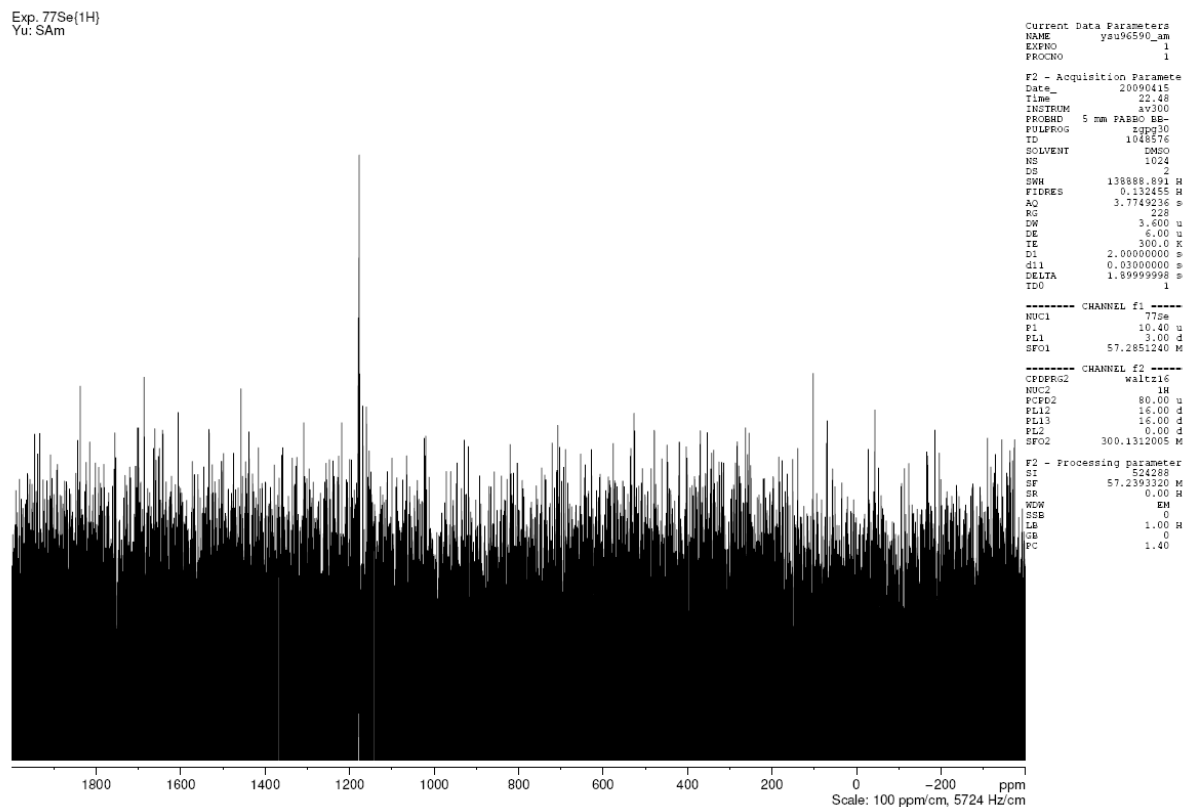

Figure SI-18.  $^{77}\text{Se}$ -NMR spectrum of **3c**

Yu\_FT\_SAm-A\_neg\_21012009  
in Methanol

21.01.2009 12:01:01

SAm - A

Yu\_FT\_SAm-A\_neg\_21012009 #8-88 RT: 0.38-4.54 AV: 81 NL: 1.76E4  
T: FTMS - p ESI Full ms [195.00-900.00]

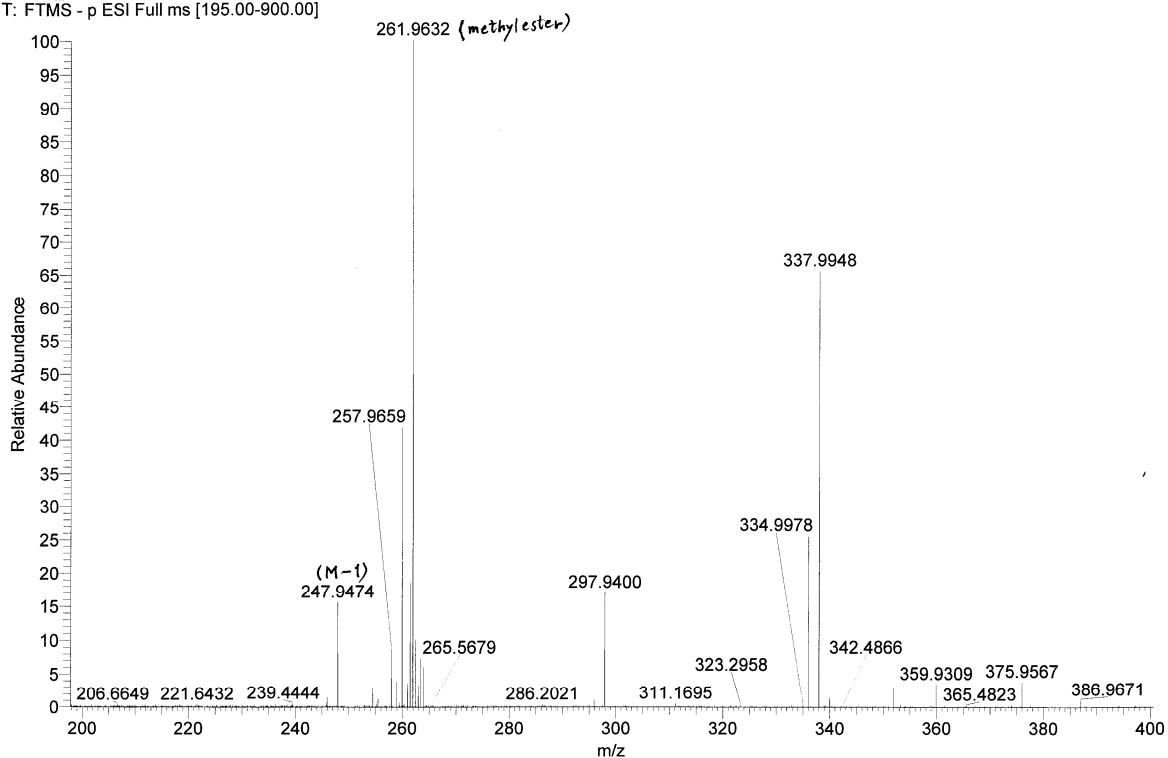

Figure SI-19. HR-MS spectrum of **3c**

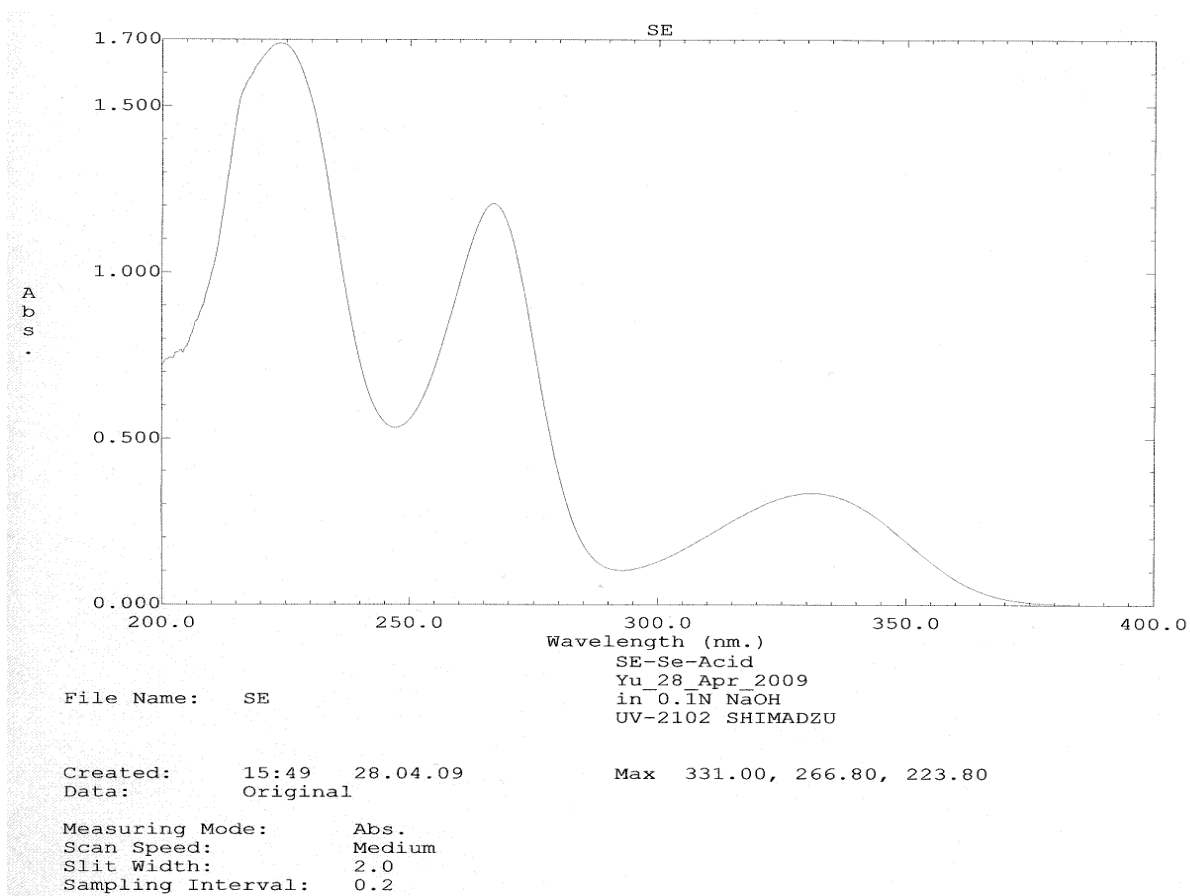

Figure SI-20. UV spectrum of **3d**

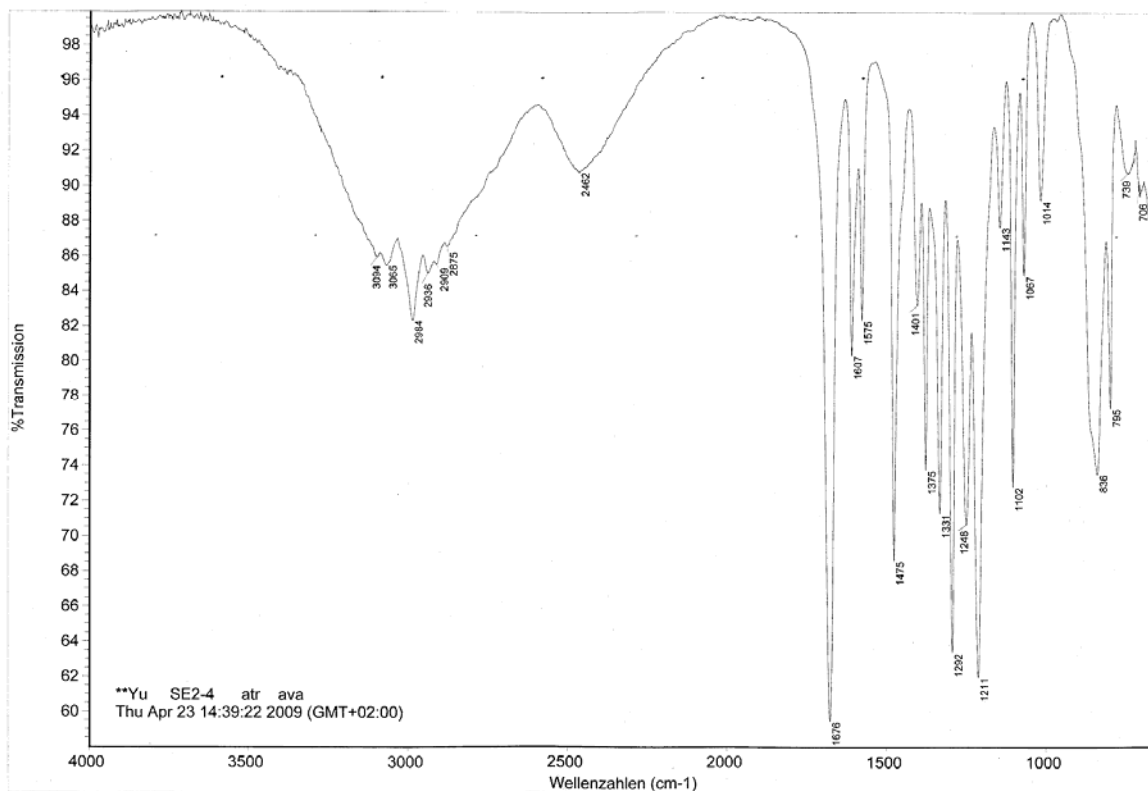

Figure SI-21. FT-IR spectrum of **3d**

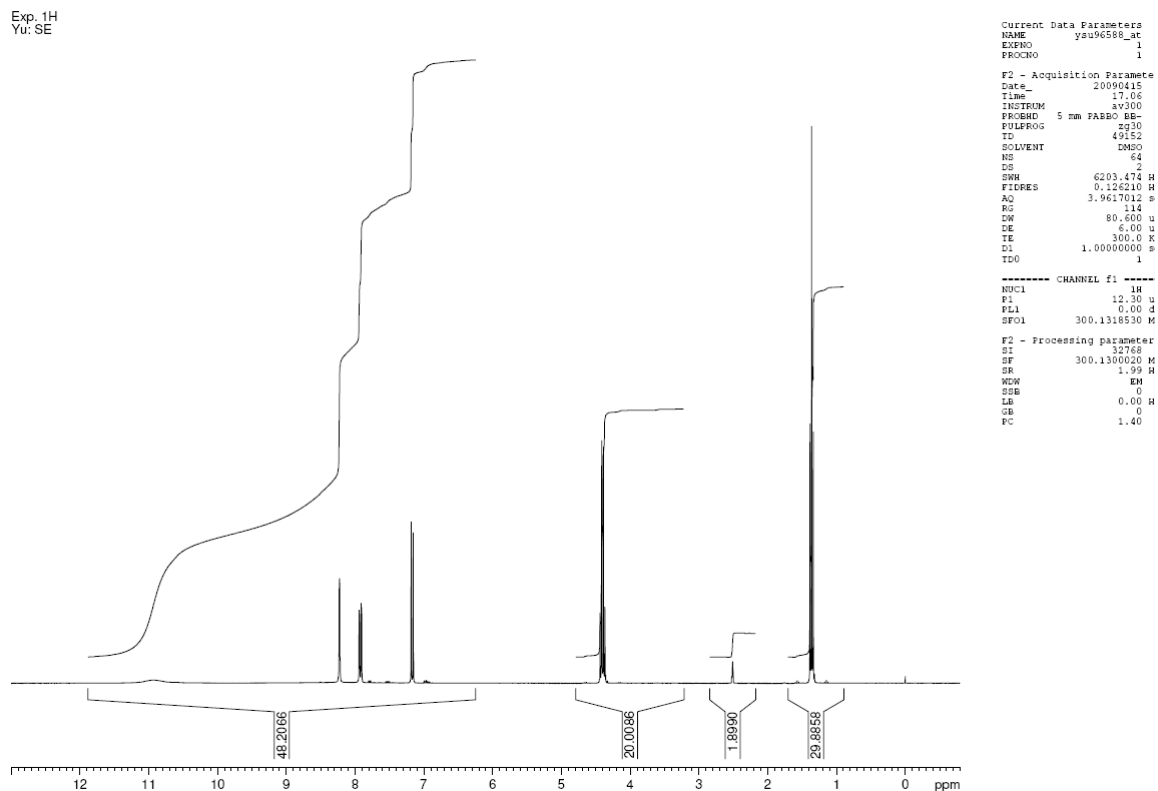

Figure SI-22.  $^1\text{H}$ -NMR spectrum of **3d**

Exp. 13C-CPD  
 Yu: SE

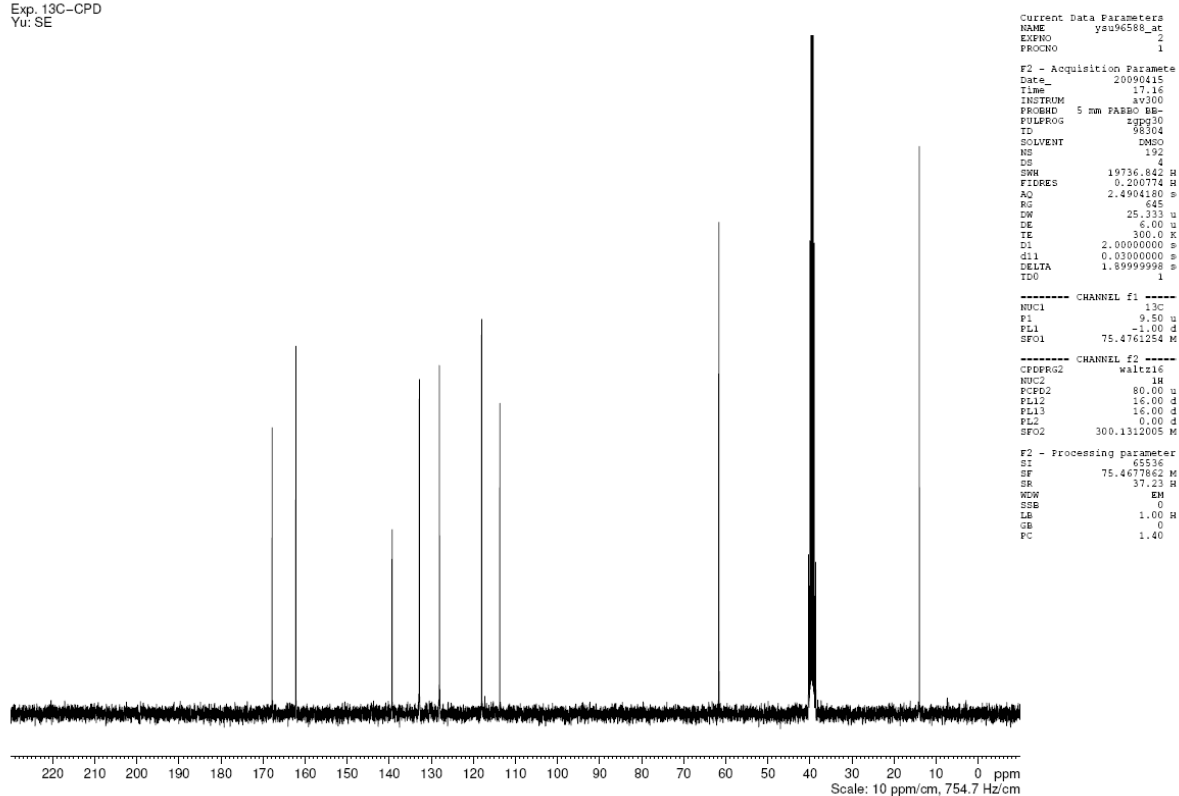

Figure SI-23. <sup>13</sup>C-NMR spectrum of **3d**

Exp. 13C-Dept135  
 Yu: SE

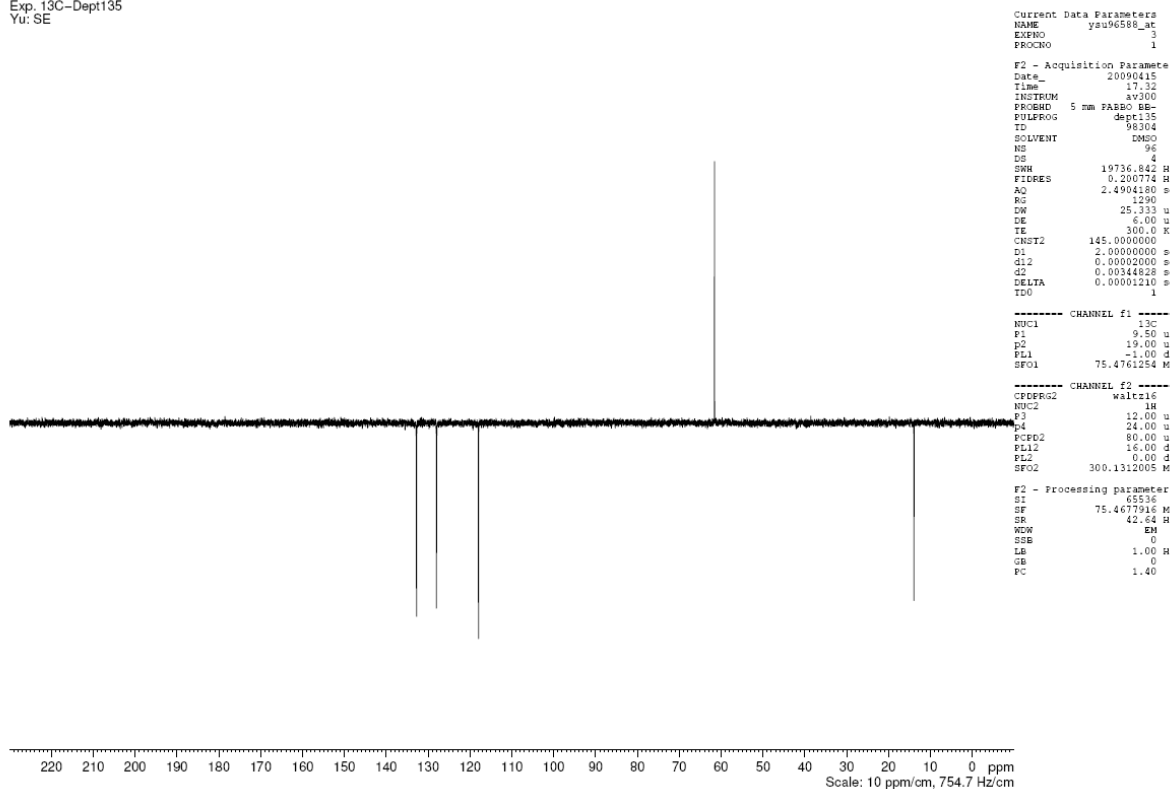

Figure SI-24. 2D-NMR spectrum (HMQC) of **3d**

Exp.  $^{77}\text{Se}$ (1H)  
Yu: SE

```
NAME ysu96588_a_k
EXPNO 4
PROCNO 1
Date_ 20090415
Time 19.15
INSTRUM ag300
PROBHD 5 mm PABBO B9-
PULPROG zgpg30
TD 1048576
SOLVENT DMSO
NS 1024
DS 2
SWH 139888.891 Hz
FIDRES 0.132455 Hz
AQ 3.7749216 sec
RG 128
DM 3.600 usec
DE 5.00 usec
TE 300.0 K
D1 2.00000000 sec
d11 0.01000000 sec
DELTA 1.89999998 sec
ZD0 1

===== CHANNEL f1 =====
NUC1 77Se
P1 16.40 usec
PL1 3.00 dB
SFO1 57.2851240 MHz

===== CHANNEL f2 =====
CDEPRG2 waltz16
NUC2 1H
PCPD2 80.00 usec
PL12 15.00 dB
PL13 16.00 dB
PL2 0.00 dB
SFO2 300.1312005 MHz
SI 524288
SF 57.2393320 MHz
SR 0.00 Hz
WDW EM
SSB 0
LB 5.00 Hz
GB 0
PC 1.40
F1P 2000.000 ppm
F2P -400.000 ppm
```

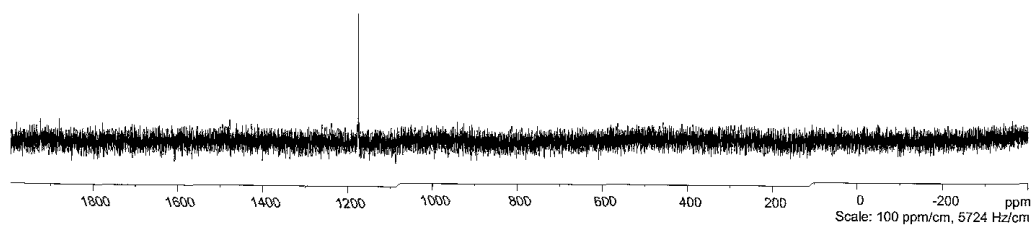

Figure SI-25.  $^{77}\text{Se}$ -NMR spectrum of **3d**

SE1-6\_Anionen\_Spritze #1-23 RT: 0.02-0.64 AV: 23 NL: 1.72E7  
T: FTMS - c ESI Full ms [150.00-2000.00]

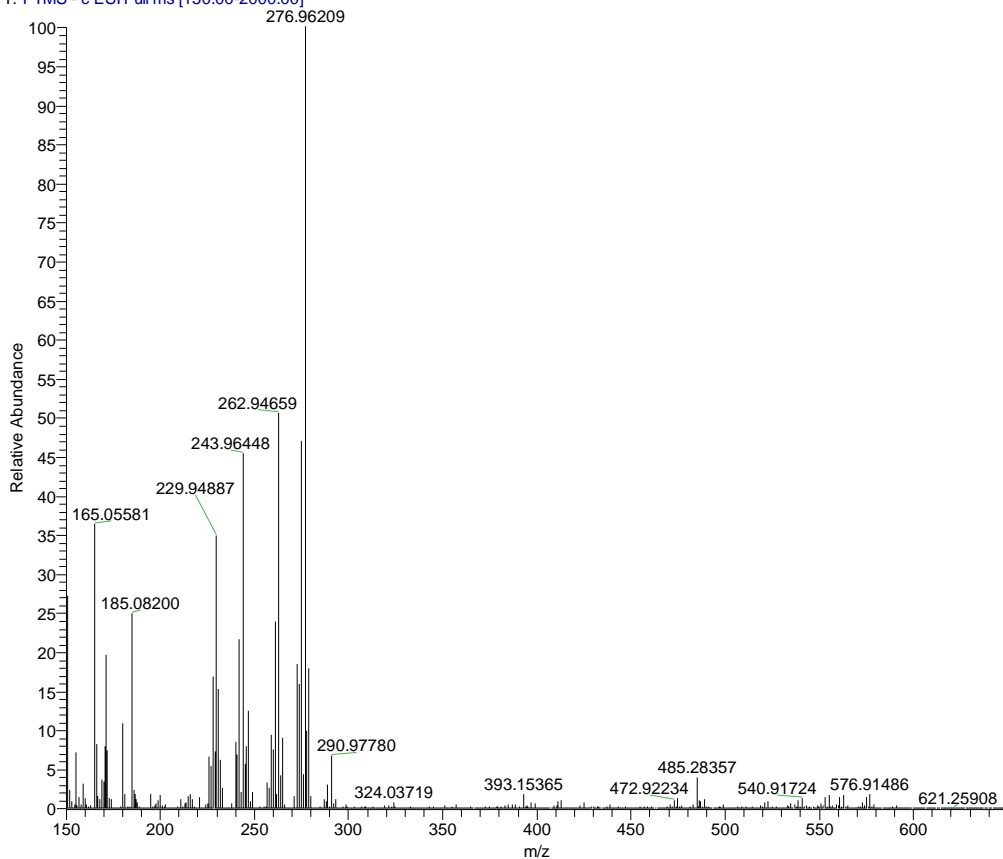

Figure SI-26. HR-MS spectrum (overview) of **3d**

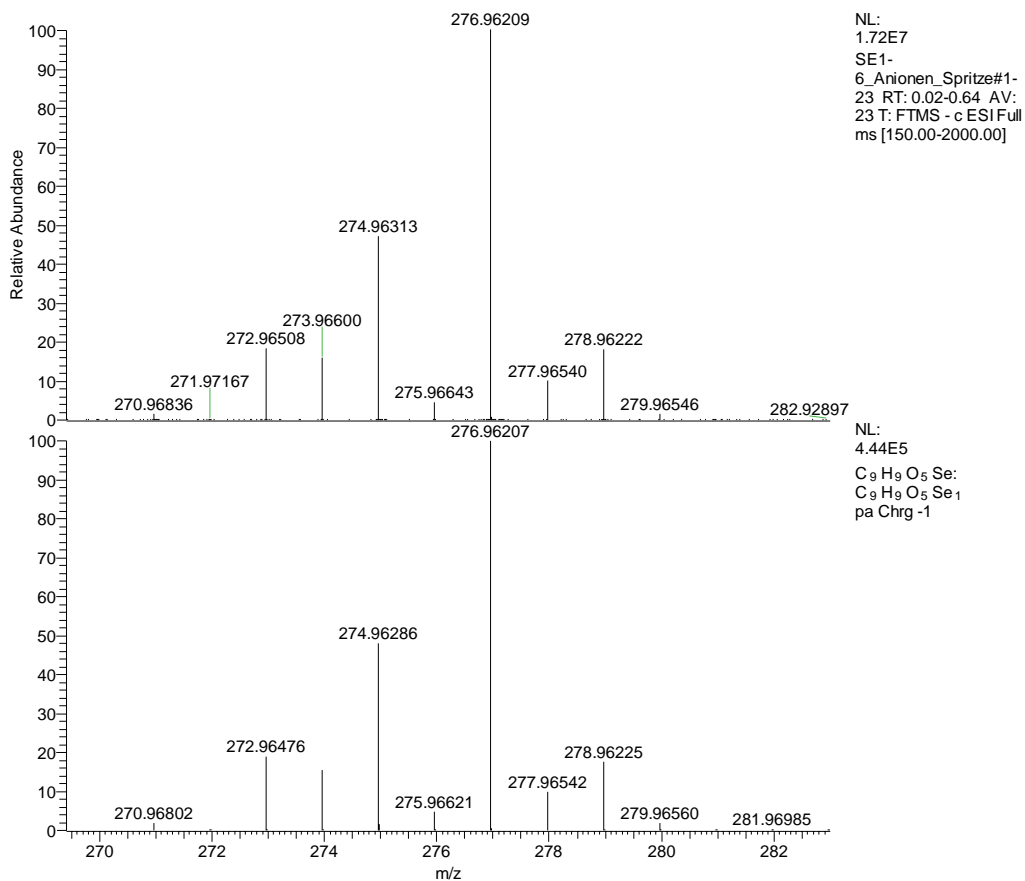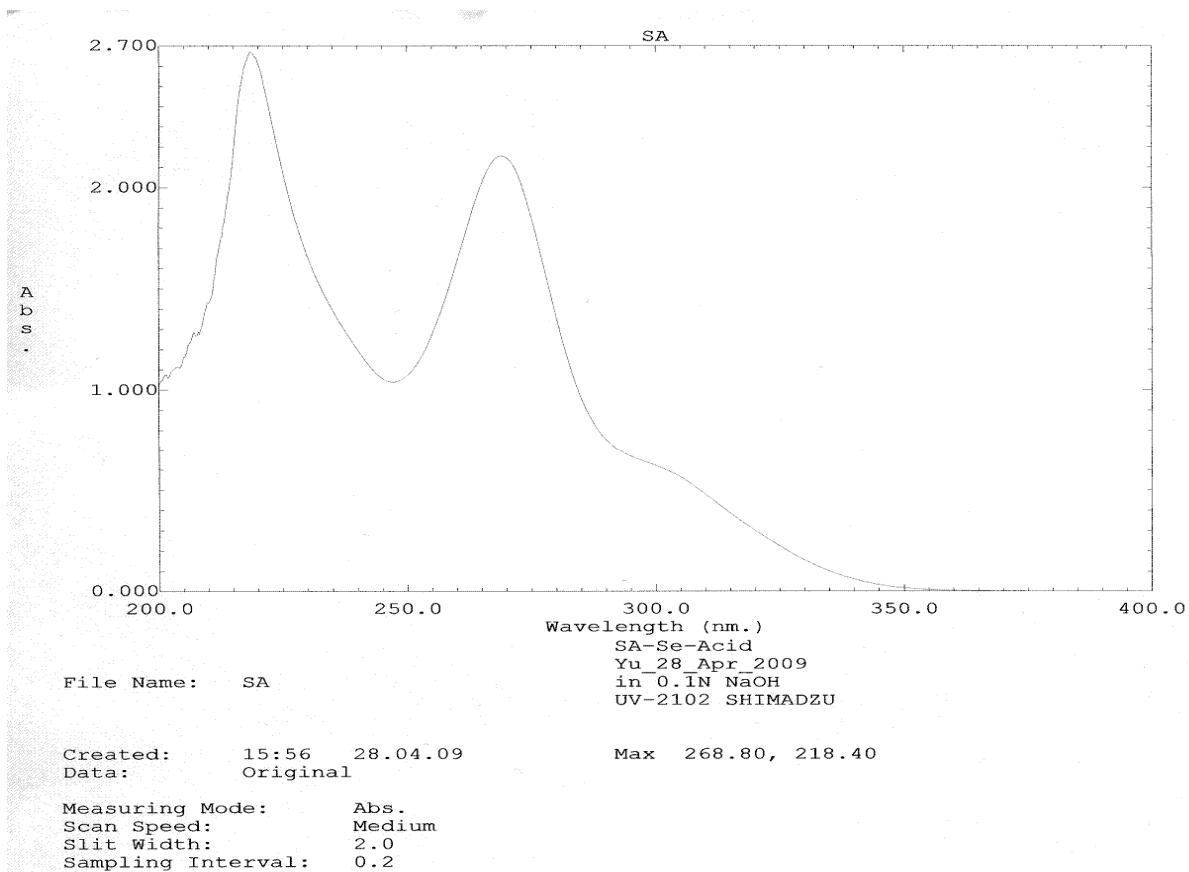

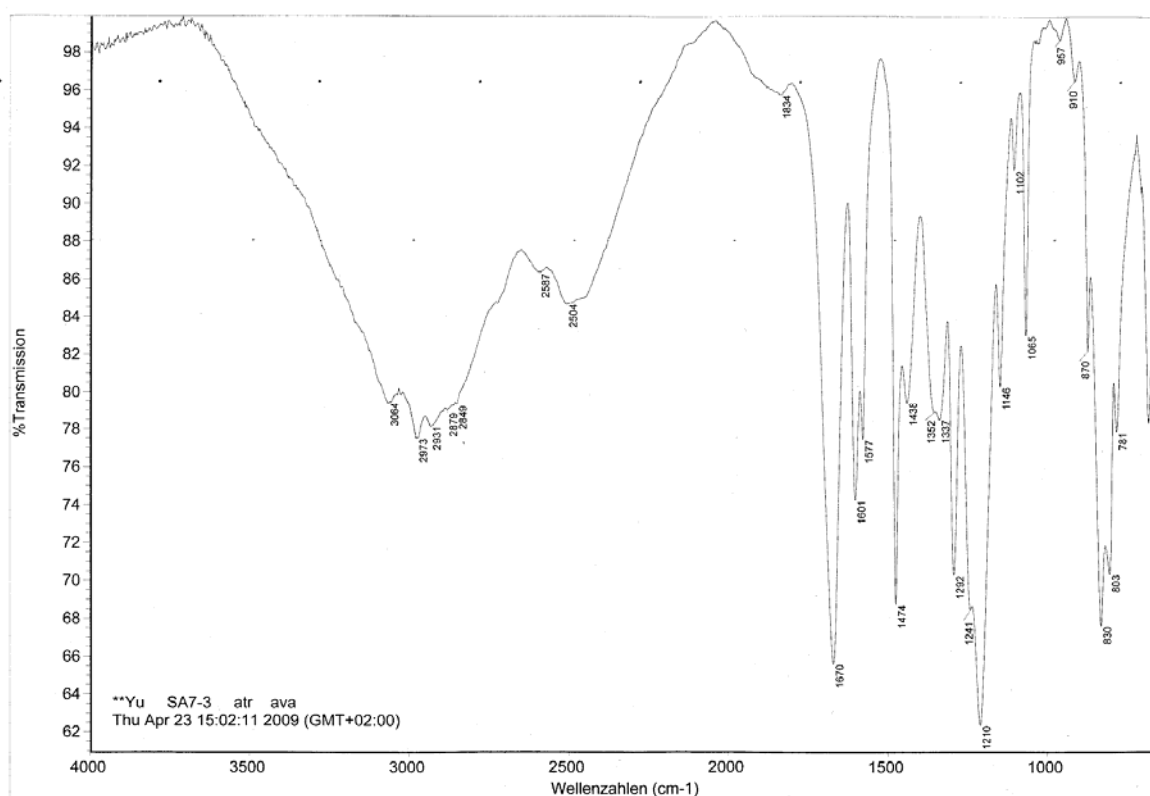

Figure SI-29. FT-IR spectrum of **3e**

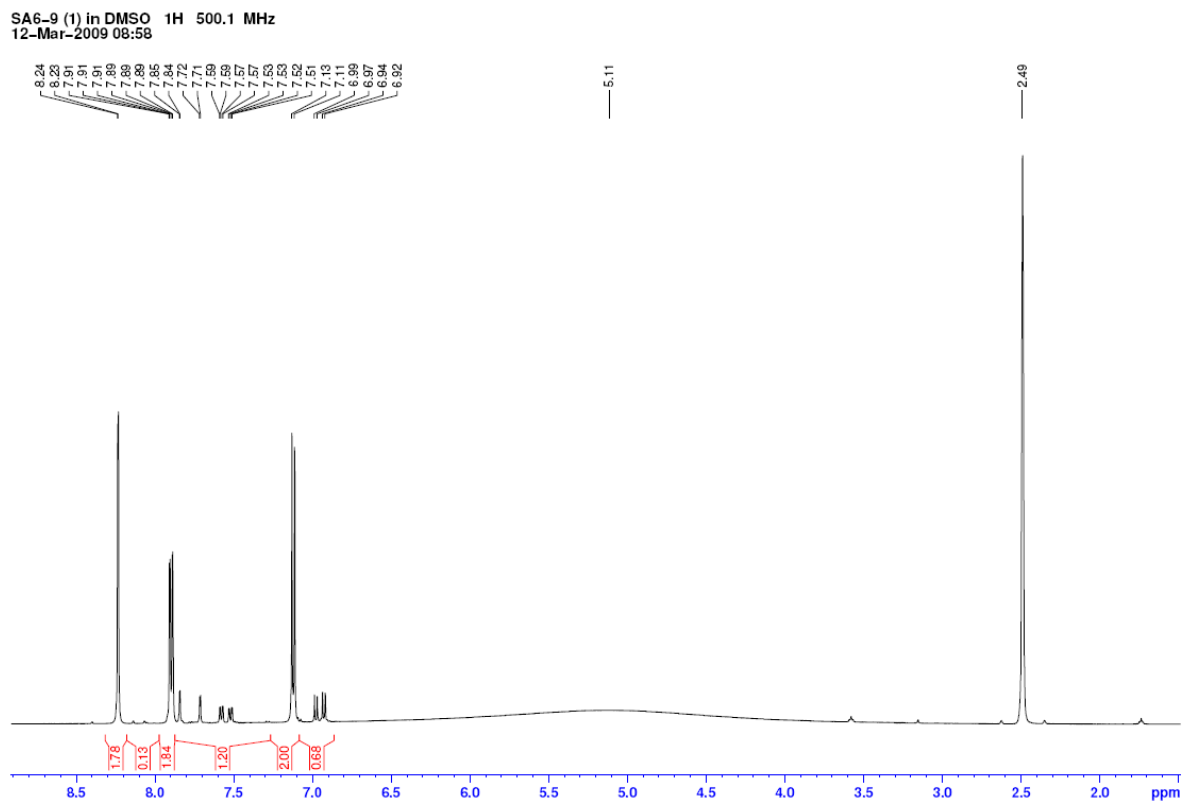

Figure SI-30.  $^1\text{H-NMR}$  spectrum (overview) of **3e**



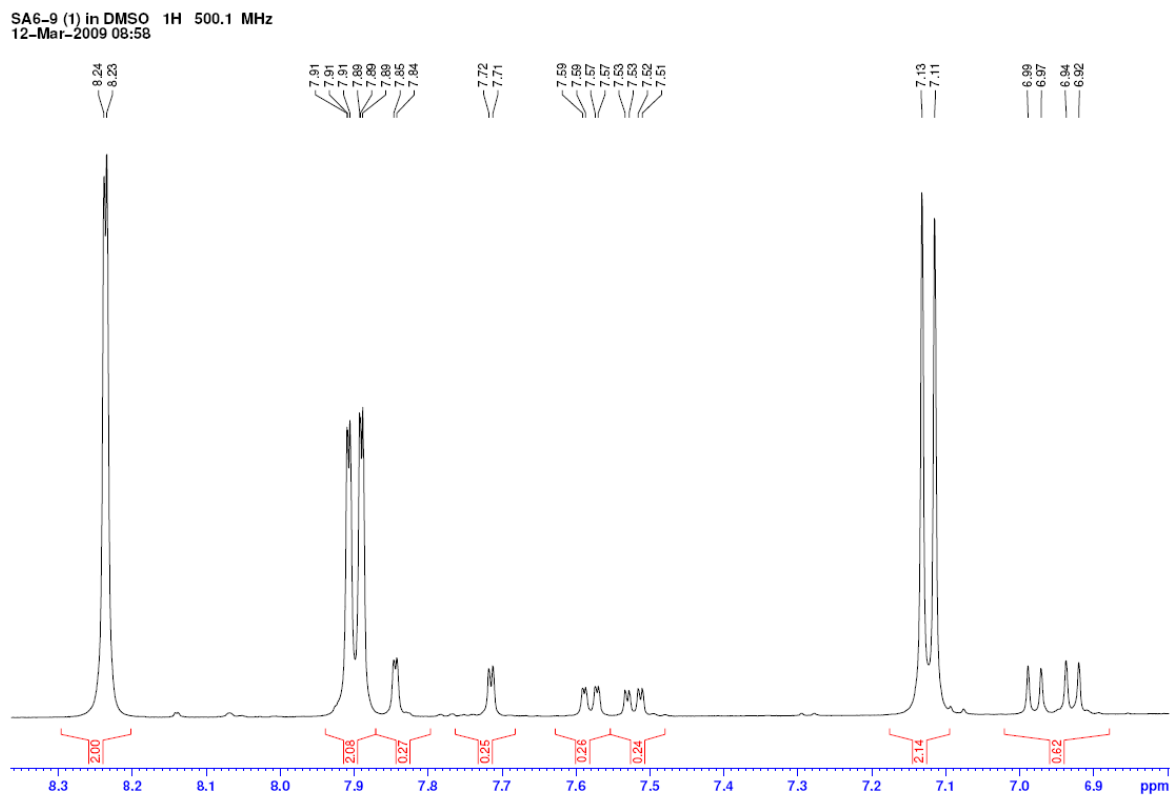

Figure SI-31.  $^1\text{H}$ -NMR spectrum (expanded) of **3e**

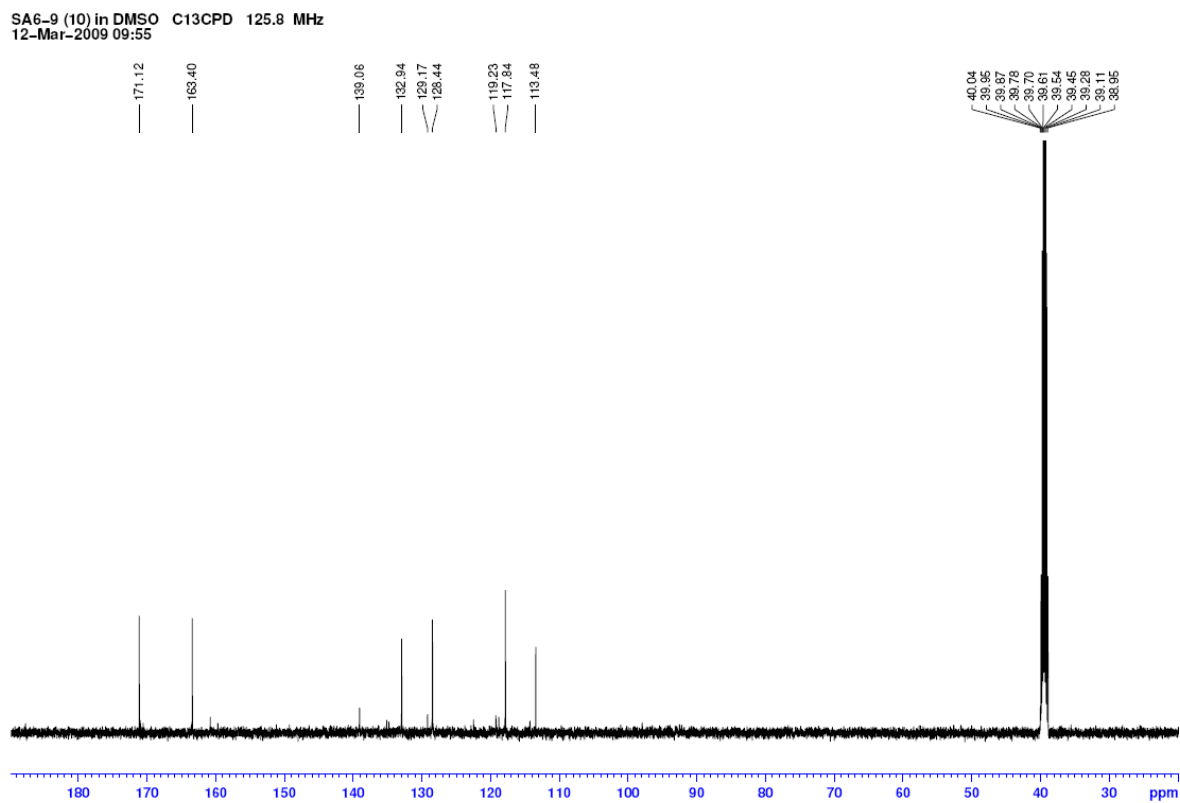

Figure SI-32.  $^{13}\text{C}$ -NMR spectrum of **3e**

SA6-9 gs-HMQC Spektrum  
 12-Mar-2009 09:29

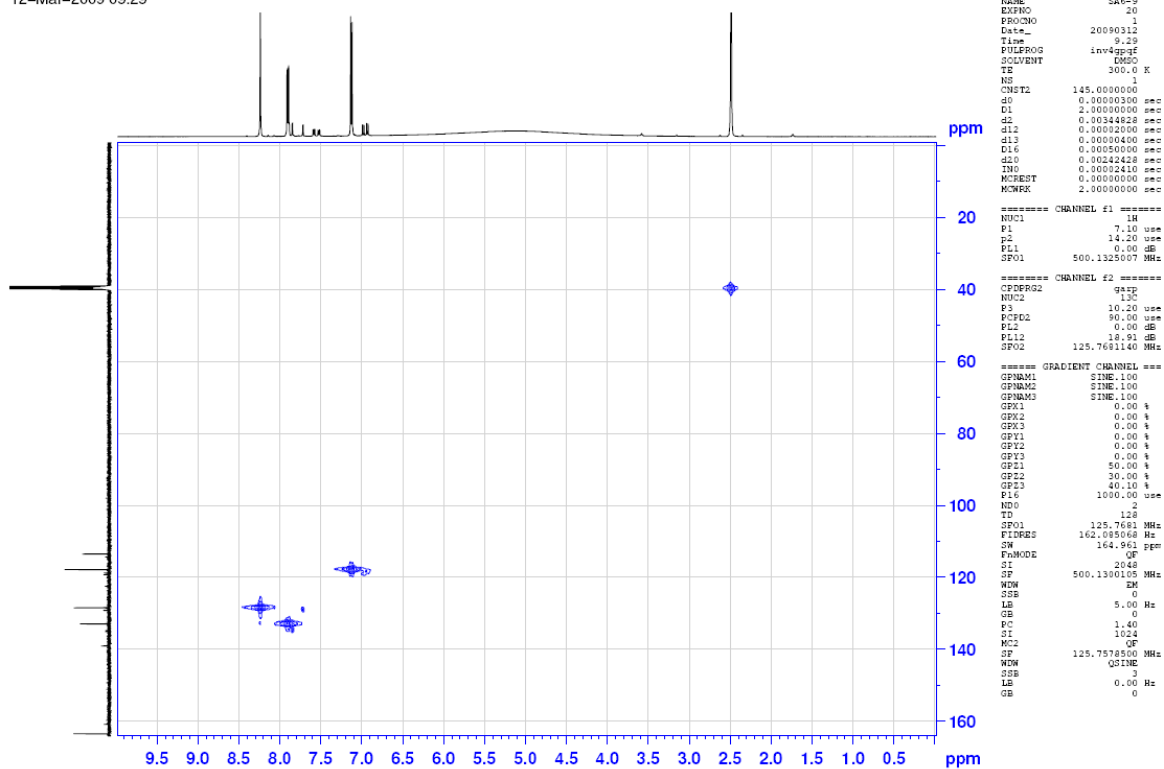

Figure SI-33. 2D-NMR spectrum (HMQC) of **3e**

Exp: 77Se(1H)  
 Yu: SA

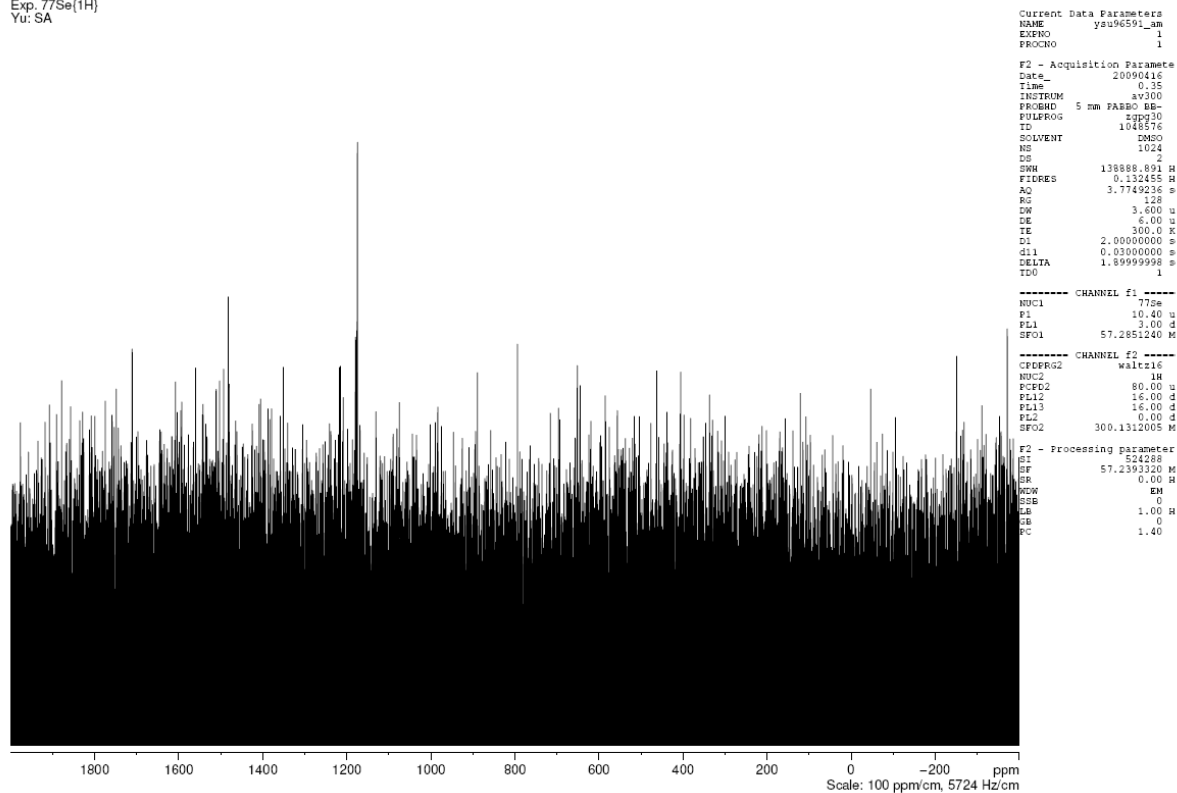

Figure SI-34.  $^{77}\text{Se}$ -NMR spectrum of **3e**

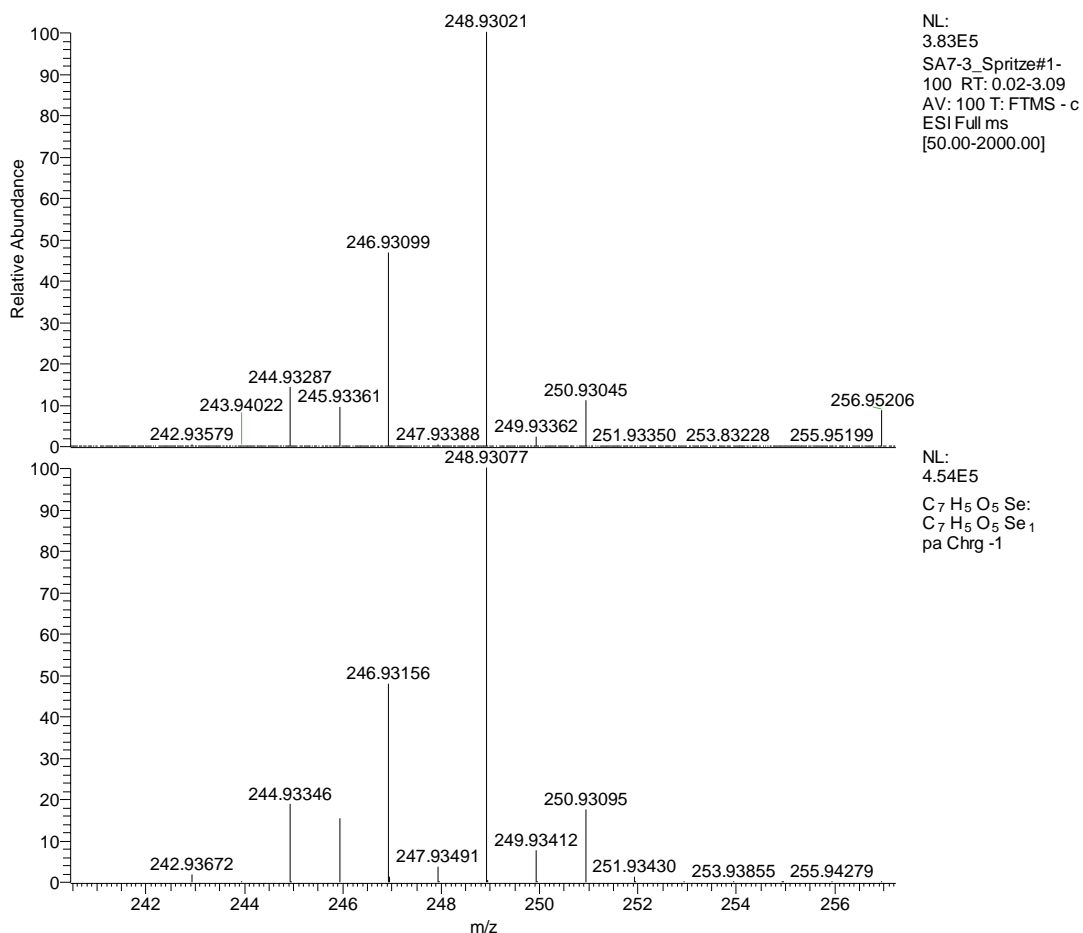

Figure SI-35. HR-MS spectrum (expanded) of **3e**

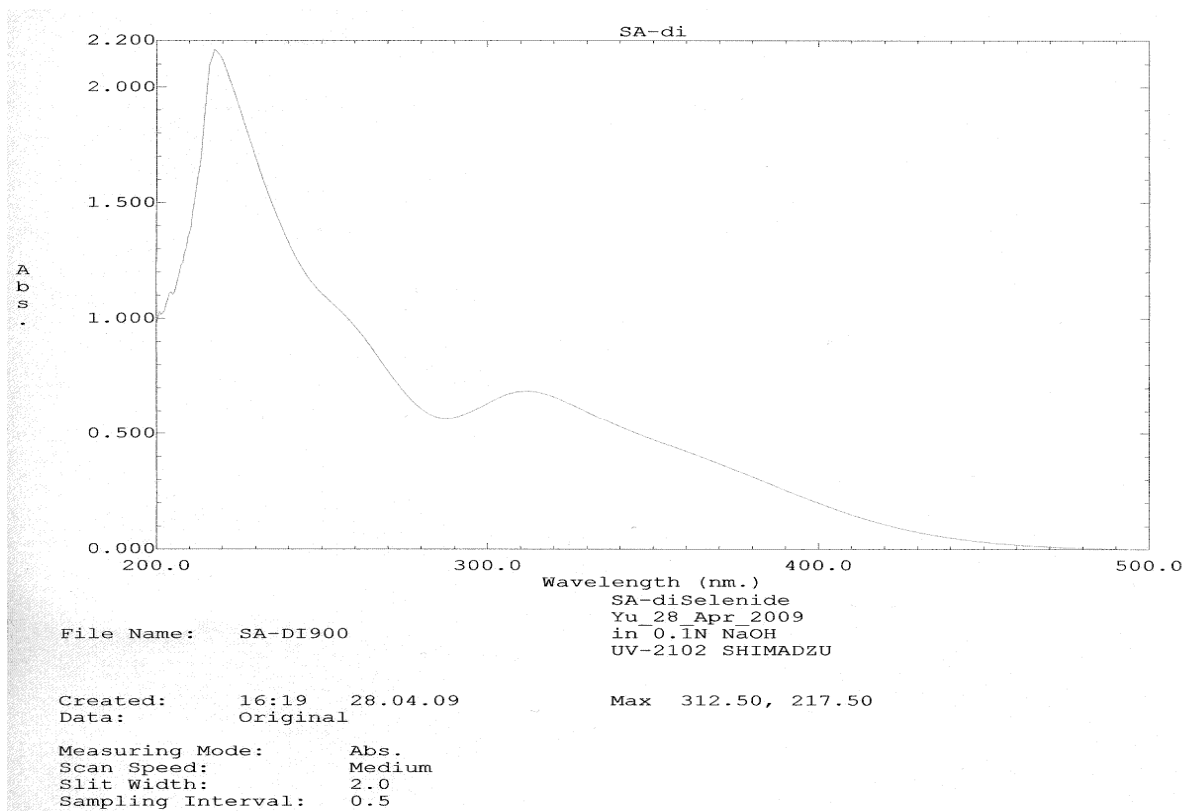

Figure SI-43. UV spectrum of **4e**

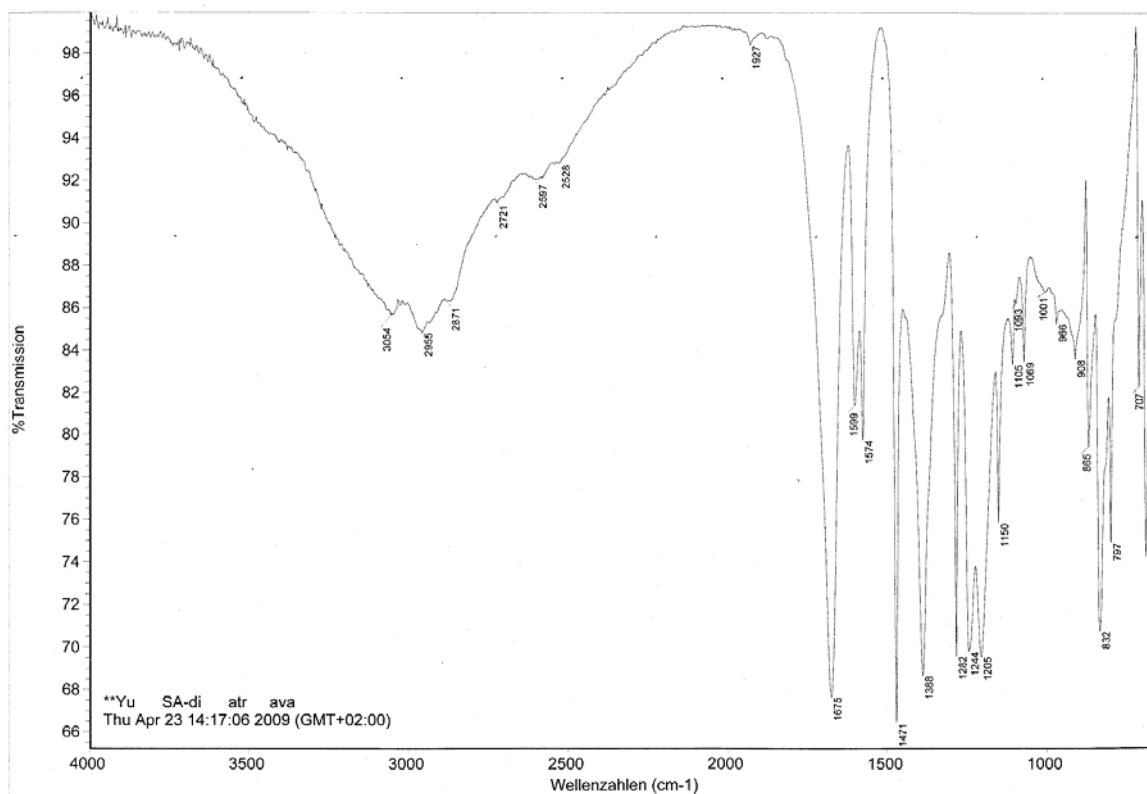

Figure SI-44. FT-IR spectrum of **4e**

SA7-6 (1) in DMSO  
18-Mar-2009 08:50

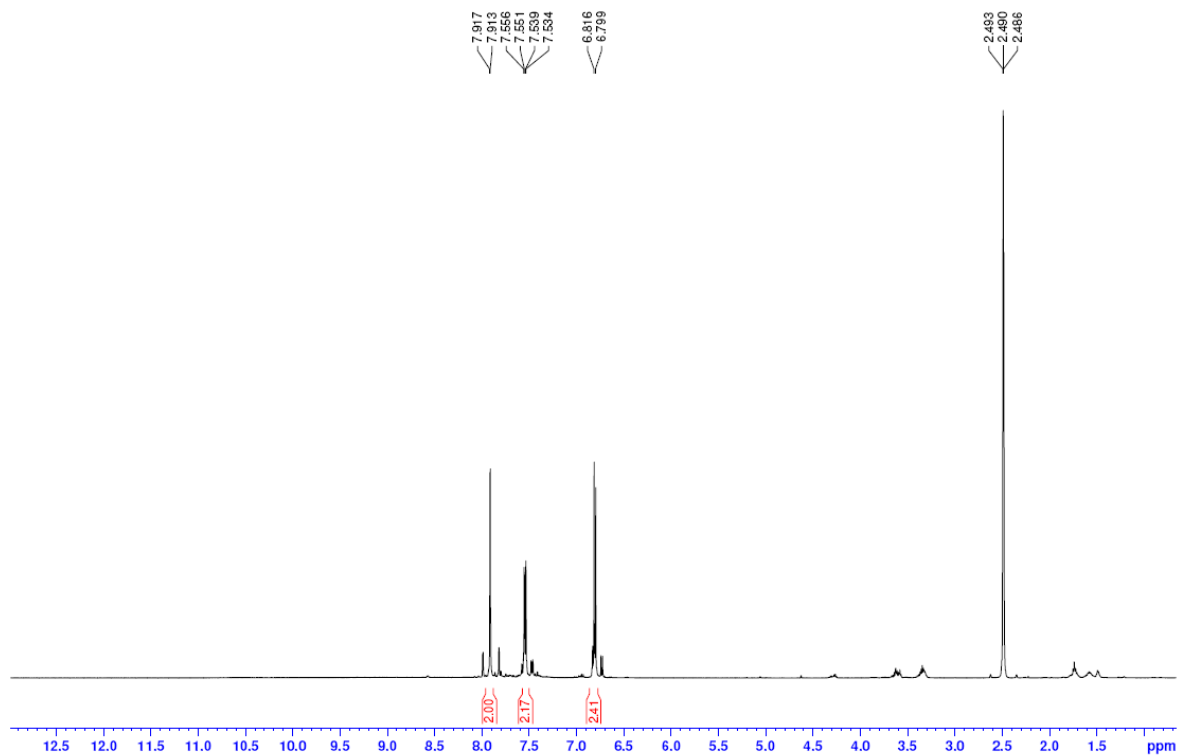

Figure SI-45.  $^1\text{H-NMR}$  spectrum (overview) of **4e**

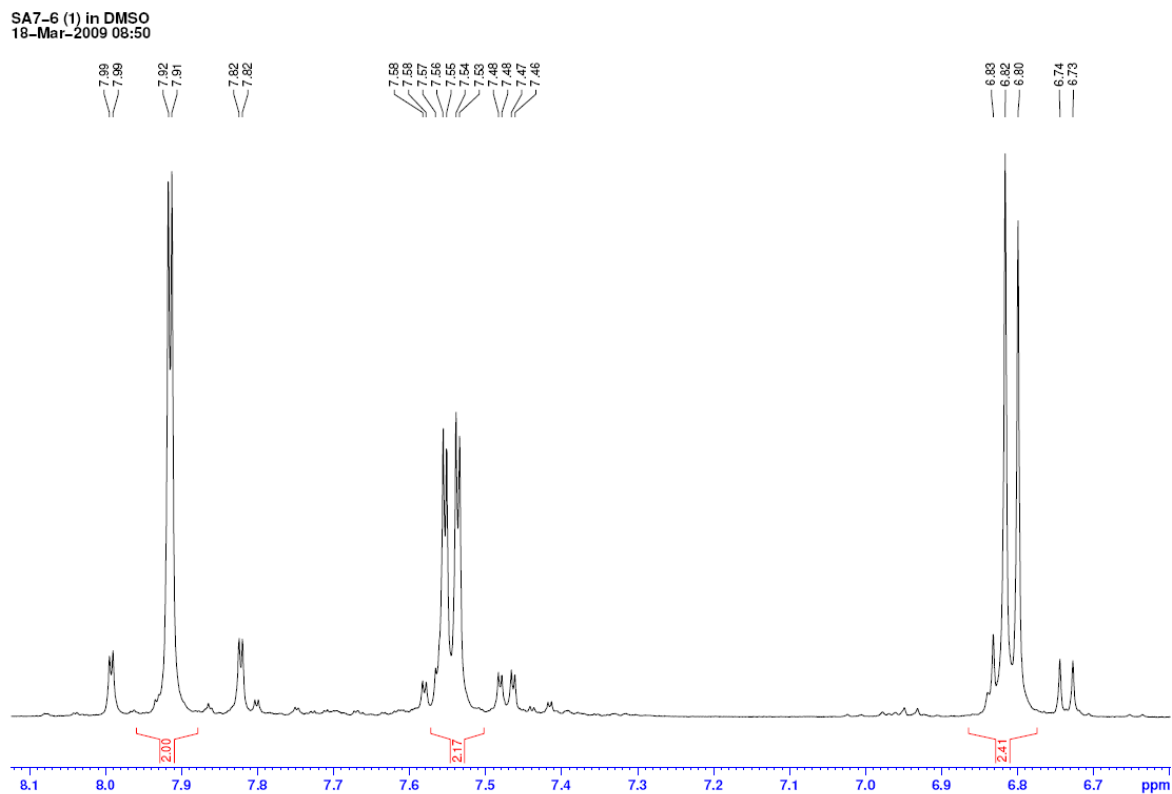

Figure SI-46.  $^1\text{H}$ -NMR spectrum (expanded) of **4e**

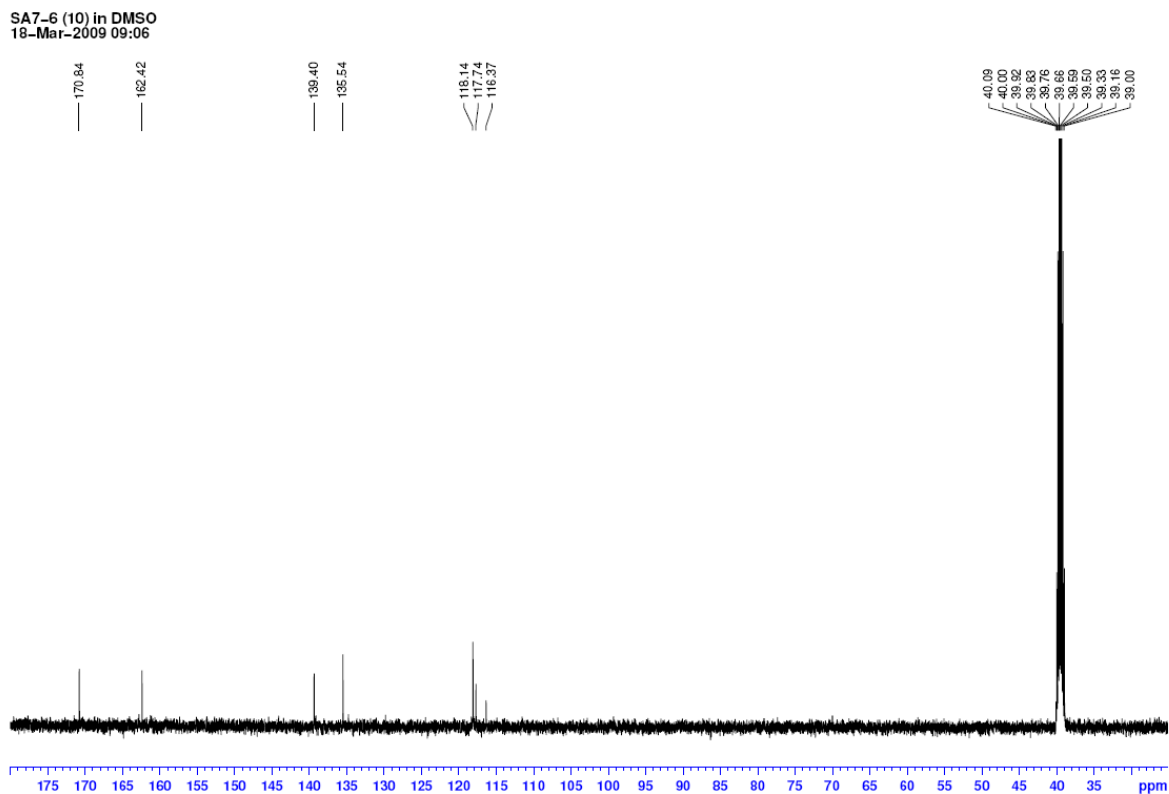

Figure SI-47.  $^{13}\text{C}$ -NMR spectrum of **4e**

Exp. 77Se(1H)  
Yu: SA-dj

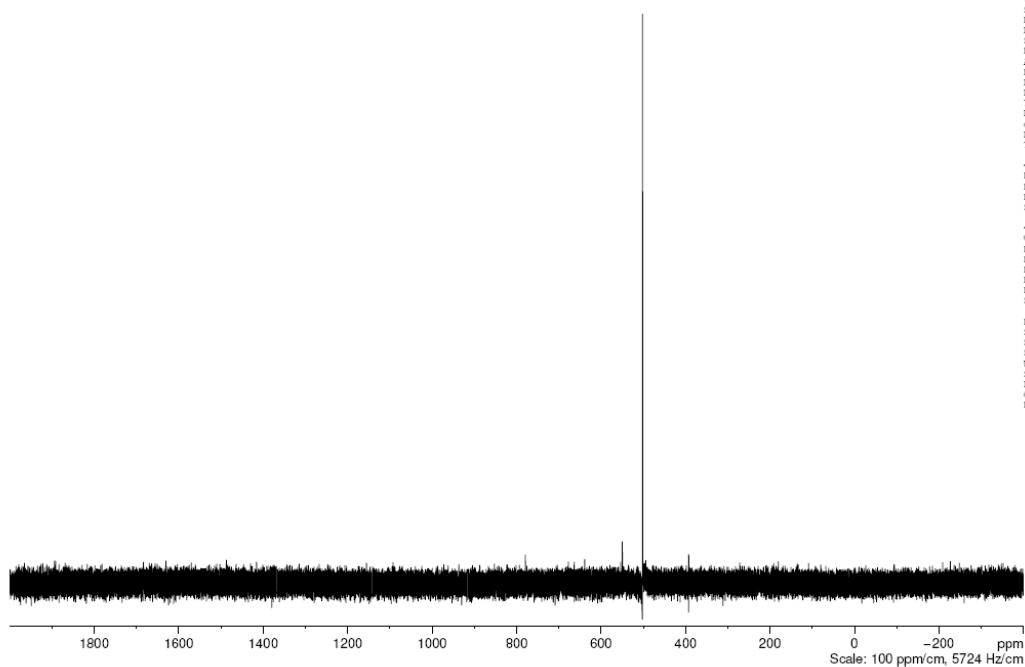

Figure SI-48.  $^{77}\text{Se}$ -NMR spectrum of **4e**

SA7-6\_Spritz #4-99 RT: 0.09-2.86 AV: 96 NL: 1.22E7  
T: FTMS - c ESI Full ms [50.00-2000.00]

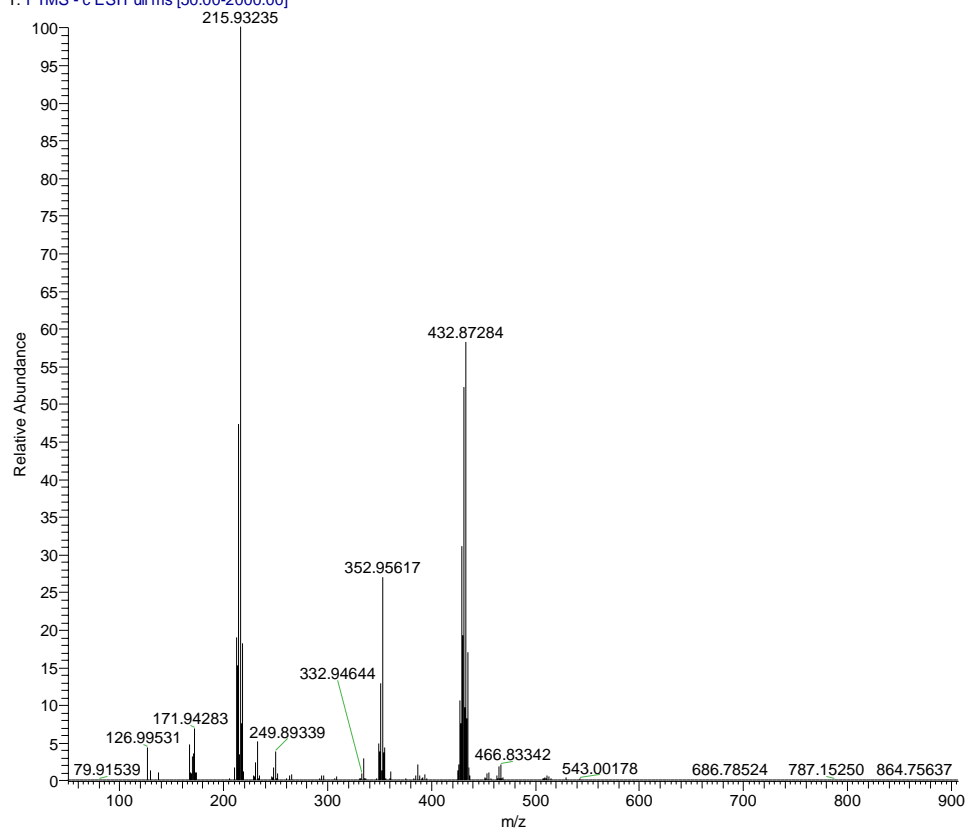

Figure SI-49. HR-MS spectrum (overview) of **4e**

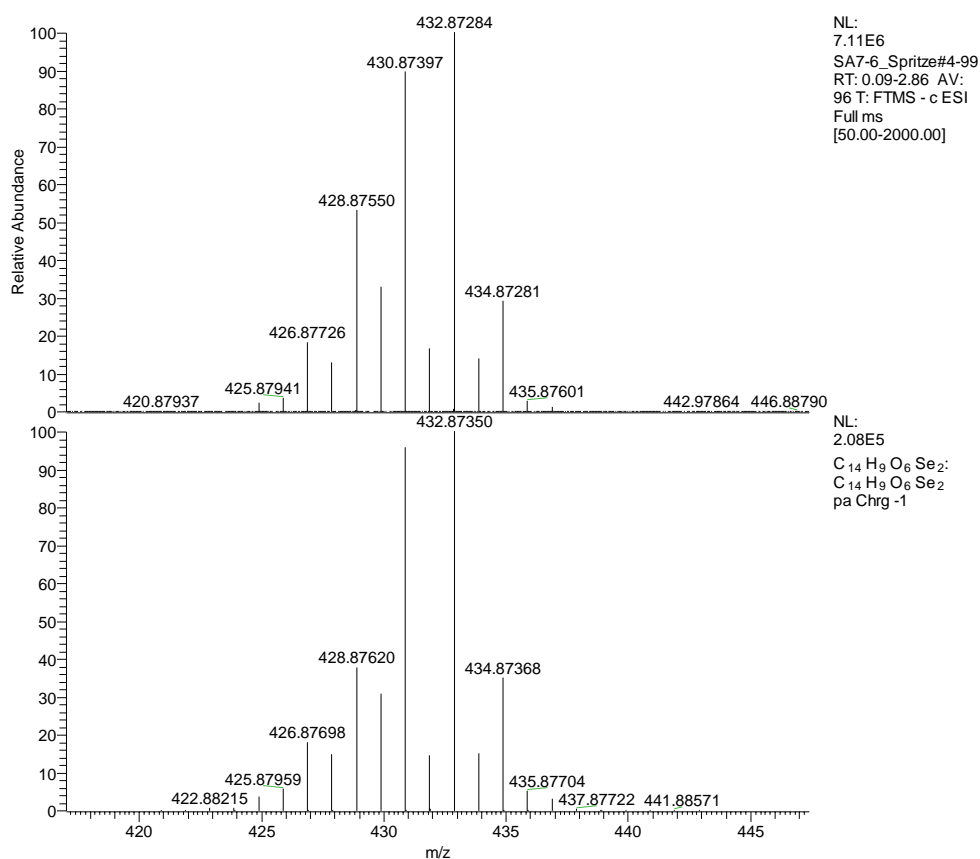

Figure SI-50. HR-MS spectrum (expanded) of **4e**

SA7-5 (1) in DMSO 1H 500.1 MHz  
18-Mar-2009 08:17

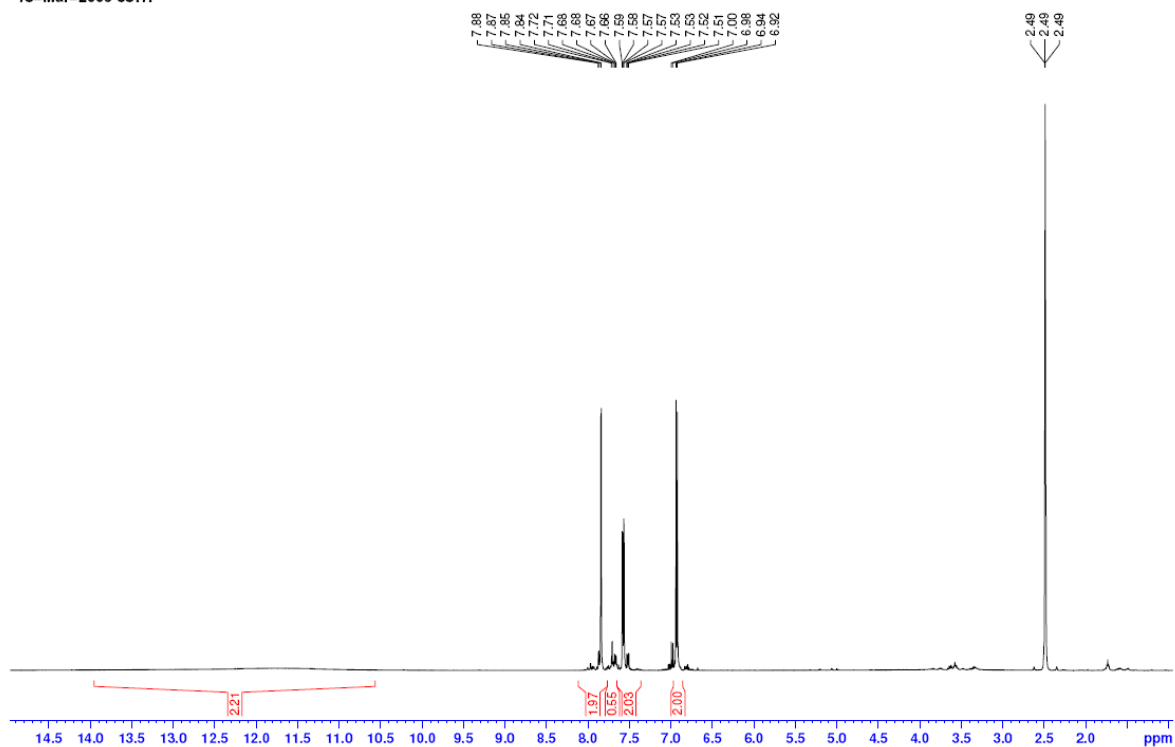

Figure SI-36. <sup>1</sup>H-NMR spectrum (overview) of **5e**

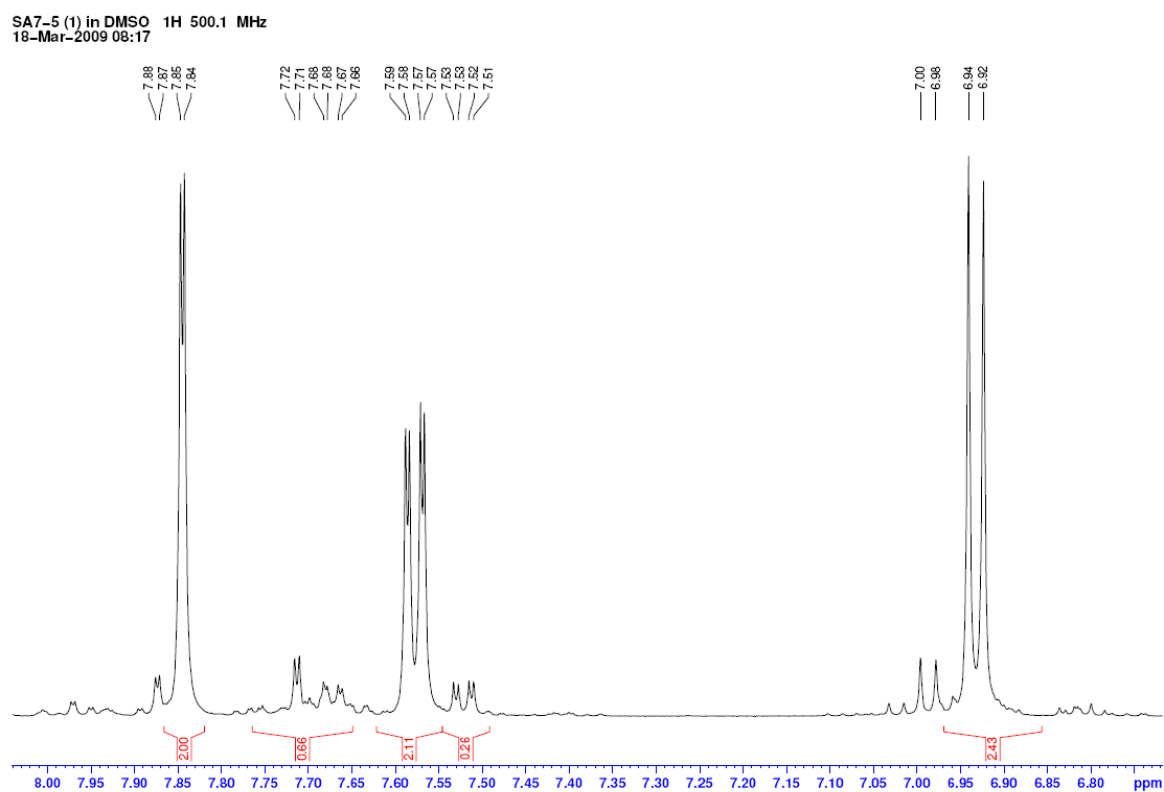

Figure SI-37.  $^1\text{H}$ -NMR spectrum (expanded) of **5e**

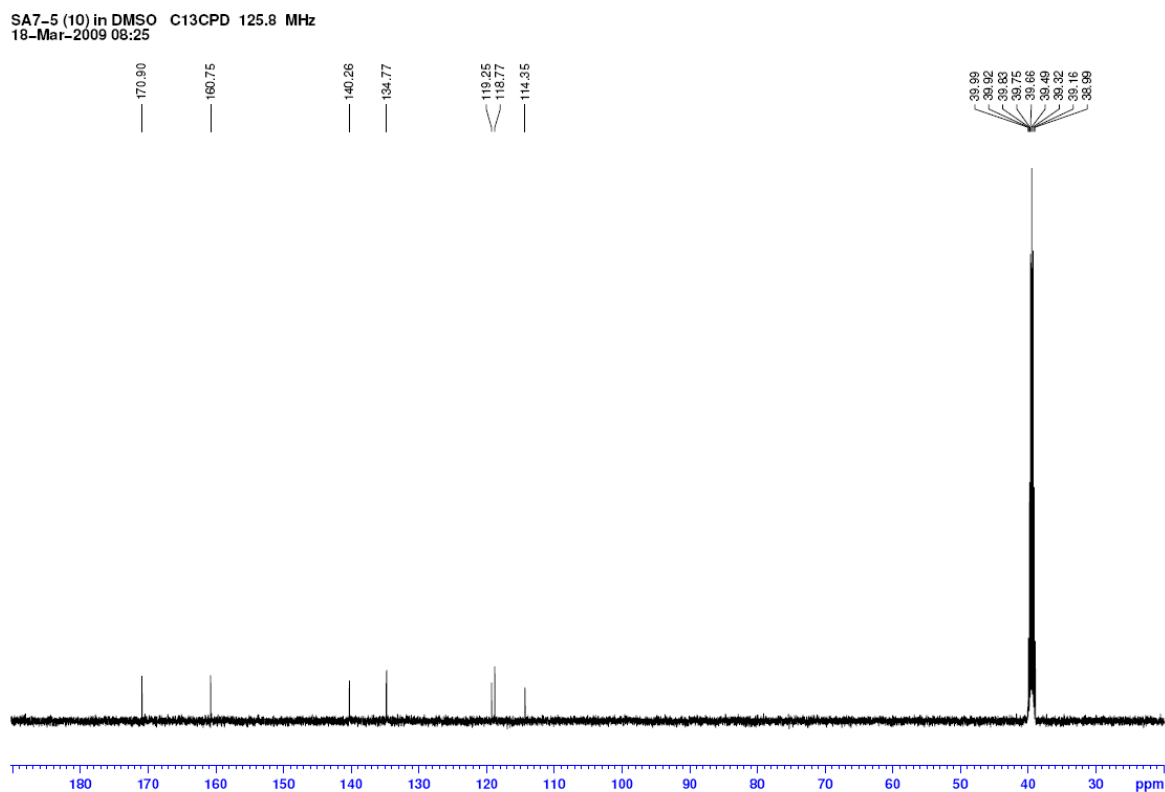

Figure SI-38.  $^{13}\text{C}$ -NMR spectrum of **5e**



SA7-5 gs-HMOC Spektrum  
 18-Mar-2009 08:27

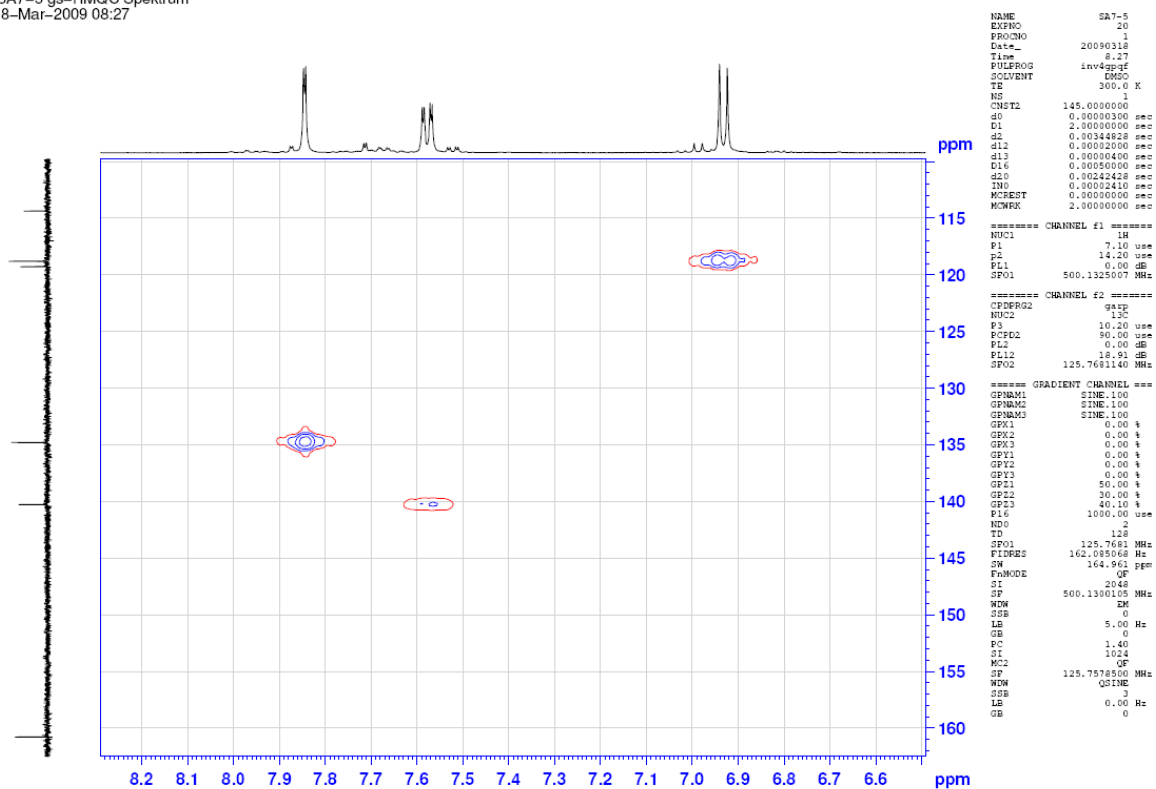

Figure SI-39. 2D-NMR spectrum (HMOC) of **5e**

Exp: 77Se(1H)  
 Yu: SA-none

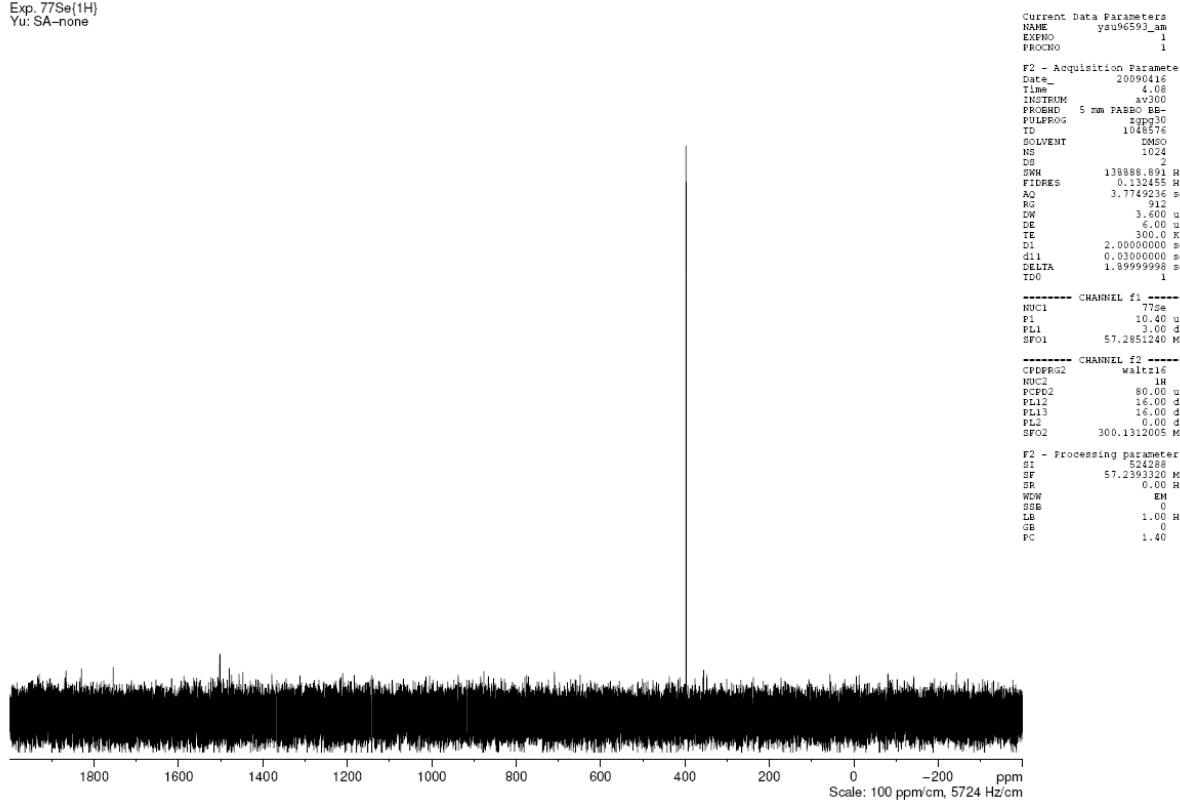

Figure SI-40. <sup>77</sup>Se-NMR spectrum of **5e**

SA7-5\_Spritz#4-100 RT: 0.11-2.89 AV: 97 NL: 1.71E7  
T: FTMS - c ESI Full ms [50.00-2000.00]

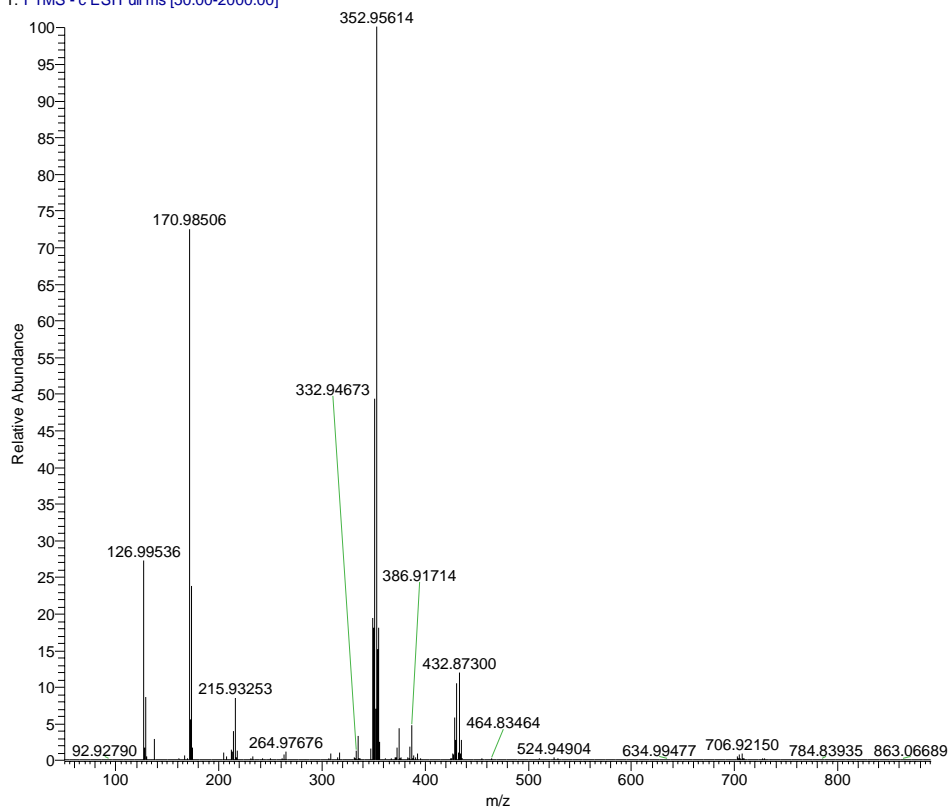

Figure SI-41. HR-MS spectrum (overview) of 5e

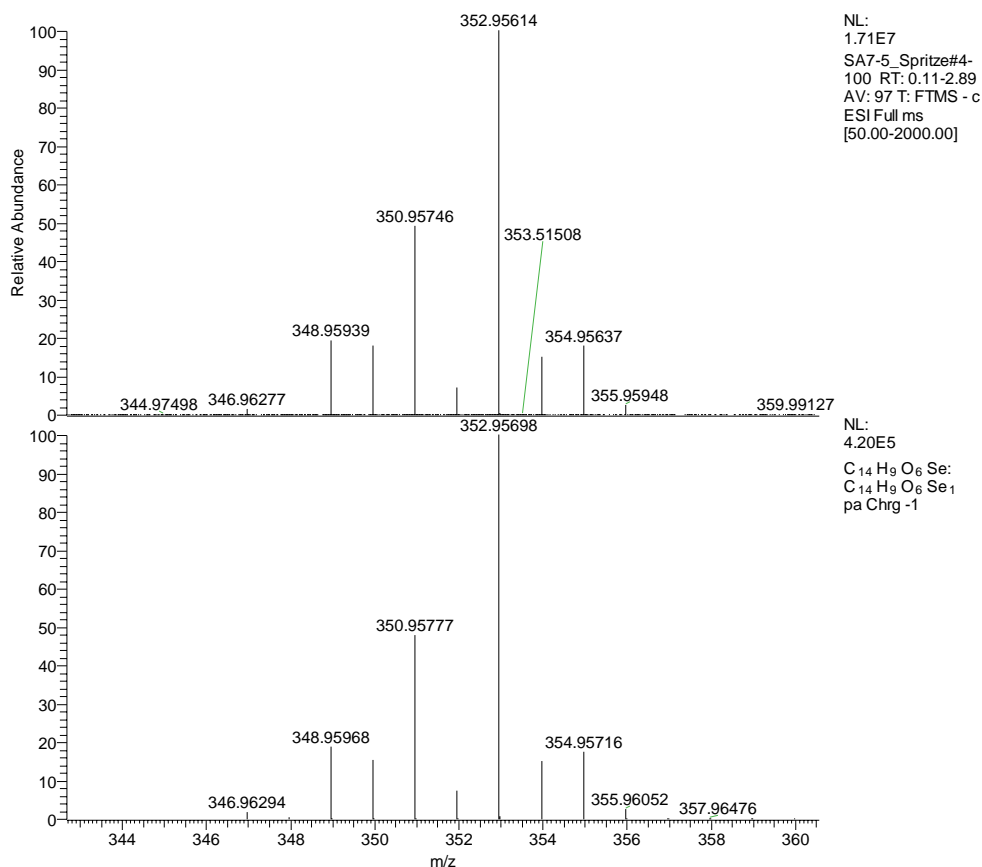

Figure SI-42. HR-MS spectrum (expanded) of 5e
